# Supplementary material
Source: PubMed Central journal article supplement (PMC6201712)
Supplement: supp_6.4.E486_2018-0088-1-at.pdf [file supp_6.4.E486_2018-0088-1-at.pdf]

## **Appendix 1 (as supplied by the authors): Supplementary information**

### **Methods**

#### ***Model validation***

The following validation techniques are based on ISPOR-SMDM recommended practices for model transparency and validation(1). As the prevention of DFUs is not well studied in literature(2), it is important to note that this model serves as a framework for future research in this area.

#### ***Face validity***

Multiple steps were taken to ensure face validity. The problem formulation process determined a focus on a Canadian context, identified a population with diabetes who are low to high risk of DFUs, defined a TM intervention that aims to prevent DFUs, and selected a time horizon that reflects the natural history of DFUs.

The model structure was constructed and rigorously adjusted by experts in modelling (WI) and diabetic foot care (KC) to emulate recommended practices in DFU prevention according to the International Working Group for the Diabetic Foot. Since the modelling of DFU prevention is in its early stages in literature, data applicable to this model was limited. With this in mind, the data sources consulted for the construction of the model were verified for appropriate study design and applicability of results. Decisions were made to include certain DFU states and to exclude others, such as not distinguishing between minor and major amputations. Also, the complexity of DFU progression was not modelled, due lack of applicable data for this progression and that representing it as a number of discrete states is clinically impractical.

#### ***Verification***

To ensure the correct mathematical equations were used in the model, a structured walk-through of the code was conducted by CB to WI. To ensure that the model performed according to its specification, extreme-value analysis was conducted by predicting the behaviour of the model when a certain parameter is adjusted.

#### ***Cross Validity***

Since no other studies have explored the cost-effectiveness of TM, we identified other studies with models that evaluate the cost-effectiveness of DFU prevention.

The first study identified was by Tennvall and Apelqvist, 2001 where a cost-utility analysis was conducted to evaluate the prevention of DFUs and amputations(3). The prevention strategy defined was patient education, foot care, and footwear. It was found that DFU and amputation incidence needs to be reduced by 25% to be cost-effective, which was identified as ICER < €100,000/QALY. This is similar to the results our model produced as there is an increase in cost per QALY gained. However model structures are different. For example, the model did not include the stratification of risk groups, but instead the model was simulated individually for each group at risk for DFUs. Also, the healing rates of DFUs were assumed to be same, regardless of which risk group the DFU originated from. This assumption can influence the

results, as DFUs with and without peripheral arterial disease can heal at different rates(4). Similarly, Ortegon et al., 2004 also varied the effectiveness (between 10%-90%) of the interventions to identify thresholds of cost-effectiveness (5). Also, the model included states for risk groups before DFU development. However, the cohort was assumed to be all in the lowest risk group and transitioned into the others over time, which is not representative of a diabetic population. Similar to Tennvall and Apelqvist 2001, this model also assumed DFUs healed at the same rates regardless of risk group. As expected, the outcomes (ICERs) between this model and ours were different. However, both models showed that, depending on prevention effectiveness, there is an increase in cost per QALY gained. Lastly, Barshes et al. 2017, estimated cost-savings in diabetic foot ulcer prevention efforts(6). Specifically, this study explored the effects of improved prevention (primary) and treatment (secondary) by varying its effectiveness. A major distinction is that this model identifies annual prevention cost thresholds for cost-savings, rather than the traditional ICER. This makes it's difficult to compare outcomes of the models. In addition, the model did not include a cost for stratifying a person into a risk group, which can significantly change the results presented. However, similar methodologies were used in both models, such as varying effectiveness thresholds and incorporating the stratification of the cohort into risk groups in order to determine appropriate screening strategies. Also, this model used a one-month cycle length, which may not reflect how DFUs progress in current available research, as follow-up visits are 1 year on average.

### ***Definitions of study parameters***

#### *Pre-DFU*

The risk groups defined in this paper were based on the guidelines from *Best Practice Recommendations for the Prevention and Management of Diabetic Foot Ulcers* published by Wounds Canada (See Table 1). These recommendations were used to define 3 risk groups for our model: low risk, moderate risk, and high risk (recurrent DFU). The high-risk group assumed that recurrent DFUs either recurred at the same spot as the prior DFU, or in a new spot, as many studies do not distinguish between the types. The transition probability into the moderate risk group was derived from the estimate of 1/3 people with diabetes having peripheral artery disease (PAD) by the American Diabetes Association and Barshes et al. 2013. The mortality rate for the moderate risk group was based on a study by Mueller et al. 2014 that reported mortality rates in patients with diabetes and PAD. The mortality rate for the low risk group was based on Statistics Canada 2008 data on the number of deaths per 100,000 population with diabetes. Amputation rates prior to DFU formation was based on a study that observed lower limb amputation rates among diabetes patients without foot ulcer in Medicare and private insurance (12).

#### *DFU*

The transition probability from a low risk group to a moderate risk group was obtained from a previous cost-effectiveness study by Ortegon et al. 2004 (5). The transition probabilities for the development of low-risk and moderate-risk DFUs were derived from Lavery et al. 2008, where the incidence of DFUs were observed in people with diabetes stratified by risk factors with preference for conservative estimates (13). Amputation rates from low risk, moderate risk and

recurrent DFUs were compared between five studies to derive the probabilities used in this model (16-21). Since little data exists on mortality rates for recurrent DFUs, and Orneholm et al. 2017 (17) reports a significantly lower mortality rate than rates reported for DFUs with PAD, it was assumed that the mortality rate is the same as having a moderate risk DFU.

#### *Amputation*

The amputation state was assumed to include both major and minor amputations and does not distinguish the cost difference between the two. The effects of this is further explored in the sensitivity analysis. When in the amputated state, a person can transition into either the healed amputation state or death. Mortality rates are adjusted as time increases via Markov tunnel states. As time increases, mortality rates increase. This increase is derived from Kaplan Meier survival estimates in Aulivola et al. 2004 and Fortington et al. 2013 (20, 21) (Figure 2).

Probability sensitivity analyses were achieved using Dirichlet and beta distributions for all state transition probabilities (22).

#### **Cost and utilities values**

##### *Measurement and Valuation of Outcomes*

Estimates of health utilities associated with each state was obtained from an extensive review of utility values in type 2 diabetes specific for economic modelling (23). This review did not include a utility value for healed DFUs, which was derived from Redekop, 2000 (24).

##### *Resource Use and Costs*

The costs of treatment were based on annual estimates of hospital costs from the Canadian Institute for Health Information's Patient Cost Estimator (25). This report included the cost of Diabetes with Foot Ulcer, Amputation of Hand/Foot, Biopsy of Bone and Orthopedic Aftercare (SI Table 3). Hopkins et al. 2015 reported that the average number of admissions per prevalent case was 0.66, so this was used to adjust the cost proportion in the DFU state (26).

The physician fees were based on the Schedule of Benefits: Physician Services under the Health Insurance Act (5) (SI Table 4). Validated by KC, billing codes descriptions used for DFUs are Wound and ulcer debridement and Wound and ulcer debridement extending into any of the following structures: tendon, ligament, bursa and/or bone. The average of these costs was used in this model. Physician fees for amputations are the average costs of Amputation-Bone Code-Musculoskeletal System for Metatarsal/phalanx disarticulation, Ray(single), Symes, Transmetatarsal/transarsal, Terminal Symes, and the average costs of Biopsies for Need-Punch, Needle – under general anesthetic, Needle – open, and Joint – open. Physician fees for screening and prevention visits prior to a DFU (for both in-person and telemedicine) and follow-up visits with a healed DFU were based the average costs for Diabetic screening with a family physician, and endocrinologist visits. Table 3 lists all of the billing codes used to derive costs in the model.

The cost of a TM solution was derived from the operating costs of the Ontario Telemedicine Network (OTN) in a financial statement from 2016 (27). The services provided by the OTN leverages similar technology required for a hypothetical telemonitoring intervention for DFUs

and was used as our baseline cost. The cost of the TM device was derived from Easterholdt et al. 2016 using [www.xe.com](http://www.xe.com), where a similar device was used to monitor DFUs (28). Since this cost is sourced from a different jurisdiction and represents a small portion of total costs, laborious cost conversion is irrelevant. The physician fees associated with the use of the device for screening was assumed to be the combined cost of telemedicine billing codes defined in the OHIP Billing Information for Telemedicine Services September 2011 and the cost of a regular in-person screening visit. This assumption was made as the type of interaction via the TM device is not defined within the Schedule of Benefits.

## Tables and Figures

**Supplementary Table A1.** Risk groups for developing DFUs used in models based on International Working Group on the Diabetic Foot (IWGDF) guidelines reported by Wounds Canada.

| Clinical state in model | IWGDF(7) | Recommended Professional Follow-up(7) | Characteristics                                                             |
|-------------------------|----------|---------------------------------------|-----------------------------------------------------------------------------|
| Low Risk for DFU        | 0        | Every 12 months                       | No loss of protective sensation<br><br>No peripheral arterial disease (PAD) |
|                         | 1        | Every 4-6 months                      | No loss of protective sensation ± non-changing foot deformity               |
| Moderate Risk for DFU   | 2a&b     | Every 3 months                        | PAD and/or deformity ± loss of protective sensation                         |
| DFU Recurrence          | 3a&b     | Every 1-3 months                      | Presence of diabetes with previous history of ulceration/amputation         |
| Active DFU states       | Urgent   | Immediate referral                    | Open ulcer ± infections<br><br>Charcot foot                                 |

**Supplementary Table A2.** All transition probability parameter estimates, and sources used in Markov Model for current screening efforts in Canada. All telemonitoring Markov Models used same parameter estimates, except DFU incidence rates. Specifically, the transition from a healed DFU state to a recurrent DFU state was decreased by 5%-40% (high-risk) and the transition from a low risk, moderate risk and healed DFU state to a DFU state was decreased by 5%-40% (population-based).

| <i>Transitions</i>             | <i>Value(Range)</i>     | <i>Source</i>             |                                                                           |
|--------------------------------|-------------------------|---------------------------|---------------------------------------------------------------------------|
| <i>Person with Diabetes</i>    | At low risk of DFU      | 66.83%                    |                                                                           |
|                                | At moderate risk of DFU | 33.0%                     | American Diabetes Association, 2014(8)                                    |
|                                | Amputation              | 0.01%                     | Rice et al., 2014(12)                                                     |
|                                | Death                   | 0.16%                     | Statistics Canada, 2014(11)                                               |
| <i>Amputation</i>              | Healed amputation       | See figure 2              |                                                                           |
|                                | Death                   | See figure 2              | Aulivola et al., 2004(20)                                                 |
| <i>At low risk of DFU</i>      | At low risk of DFU      | 99.46%                    |                                                                           |
|                                | Amputation              | 0.01% (0.00667 - 0.01334) | Rice et al., 2014(12)                                                     |
|                                | Develop low risk DFU    | 0.3% (0.18 - 0.41)        | Lavery et al., 2008(13)                                                   |
|                                | Death                   | 0.16%                     | Statistics Canada, 2014(11)                                               |
|                                | At moderate risk of DFU | 0.07%                     | Ortegon et al., 2004(5)                                                   |
| <i>Develop low risk DFU</i>    | Develop low risk DFU    | 52.45%                    |                                                                           |
|                                | Healed DFU              | 45.71%                    | Prompers et al., 2008(4)                                                  |
|                                | Amputation              | 0.67% (0.3 - 0.77)        | Lavery et al., 2008(13), Moulik et al., 2003(8), Prompers et al., 2008(4) |
|                                | Death                   | 1.17% (1.01 - 2.57)       | Prompers et al., 2008(4), Morbach et al., 2012(16)                        |
| <i>At moderate risk of DFU</i> | At moderate risk of DFU | 99.38%                    |                                                                           |

|                                  |                       |                       |                                                                                                     |
|----------------------------------|-----------------------|-----------------------|-----------------------------------------------------------------------------------------------------|
| <i>Develop moderate risk DFU</i> | Amputation            | 0.01%                 | Rice et al., 2014(12)                                                                               |
|                                  | Develop high risk DFU | 0.45% (0.27 - 1.31)   | Lavery et al., 2008(13)                                                                             |
|                                  | Death                 | 0.67%                 | Mueller et al., 2014(10)                                                                            |
|                                  | Develop high risk DFU | 61.68%                |                                                                                                     |
|                                  | Healed DFU            | 32.32%                | Prompers et al., 2008(4)                                                                            |
|                                  | Amputation            | 2.74% (0.063 - 8.54)  | Lavery et al., 2008(13), Morbach et al., 2012(16), Oyibo et al., 2001(15), Prompers et al., 2008(4) |
| <i>Healed DFU</i>                | Death                 | 3.26% (3.26 - 8.07)   | Prompers et al., 2008(4), Morbach et al., 2012(16)                                                  |
|                                  | Healed DFU            | 87.06%                |                                                                                                     |
|                                  | Develop recurrent DFU | 11.21% (7.17 - 15.66) | Armstrong et al., 2017(18), Dubsky et al., 2013(13)                                                 |
| <i>Recurrent DFU</i>             | Amputation            | 0.01%                 | Rice et al., 2014(12)                                                                               |
|                                  | Death                 | 1.01% (0.57 - 1.56)   | Orneholm et al., 2017(17)                                                                           |
|                                  | Recurrent DFU         | 81.78%                |                                                                                                     |
|                                  | Healed DFU            | 11.51%                | Orneholm et al., 2017(17)                                                                           |
|                                  | Amputation            | 3.45% (0.68 - 3.45)   | Lavery et al., 2008(5), Orneholm et al., 2017(17)                                                   |
|                                  | Death                 | 3.26%                 | Prompers et al., 2008(4), Morbach et al., 2012(9), Orneholm et al., 2017(17)                        |

**Supplementary Table A3.** Canadian Institute for Health Information Patient Cost Estimator (25) data used for costing DFUs and amputations.

| Case Mix Group                         | Age Group               | Estimated Average Cost | Estimated Average Cost (all age groups) | Average Acute LOS days |
|----------------------------------------|-------------------------|------------------------|-----------------------------------------|------------------------|
| 402 Diabetes with Foot Ulcer           | 18-59 Years (Adult)     | \$ 9,984.36            | \$ 10,250.73                            | 7.8377483              |
|                                        | 60-79 Years (Adult)     | \$ 10,647.33           | \$ 10,250.73                            | 9.4900459              |
|                                        | 80+ Years (Adult)       | \$ 9,822.41            | \$ 10,250.73                            | 9.8122271              |
| 183 Amputation of Hand/Foot            | 18-59 Years (Adult)     | \$ 9,864.15            | \$ 10,071.53                            | 8.6962963              |
|                                        | 60-79 Years (Adult)     | \$ 10,153.88           | \$ 10,071.53                            | 9.4888889              |
|                                        | 80+ Years (Adult)       | \$ 10,138.53           | \$ 10,071.53                            | 12                     |
| 342 Biopsy/Invasive Inspection of Bone | 1-7 Years (Paediatric)  | \$ 5,406.19            | \$ 5,145.99                             | 5.0833333              |
|                                        | 8-17 Years (Paediatric) | \$ 4,069.78            | \$ 5,145.99                             | 1.8627451              |
|                                        | 18-59 Years (Adult)     | \$ 4,758.34            | \$ 5,145.99                             | 2.6986301              |
|                                        | 60-79 Years (Adult)     | \$ 5,387.70            | \$ 5,145.99                             | 3.6666667              |
|                                        | 80+ Years (Adult)       | \$ 9,163.79            | \$ 5,145.99                             | 12.434783              |



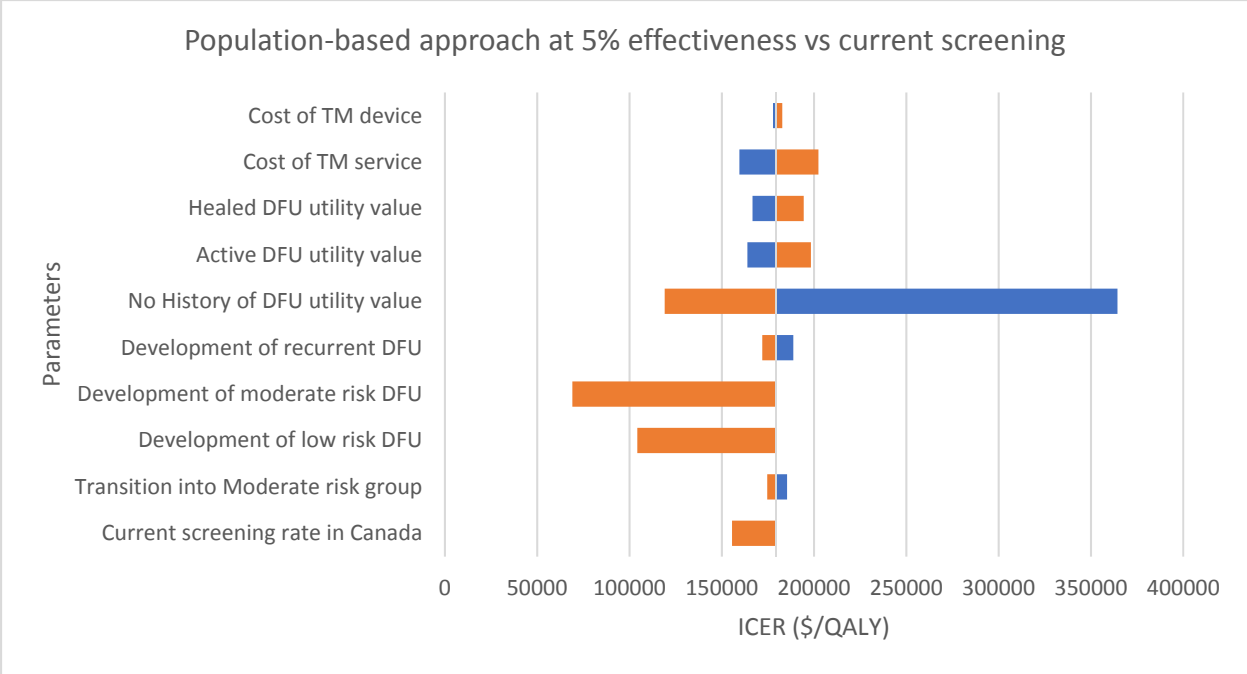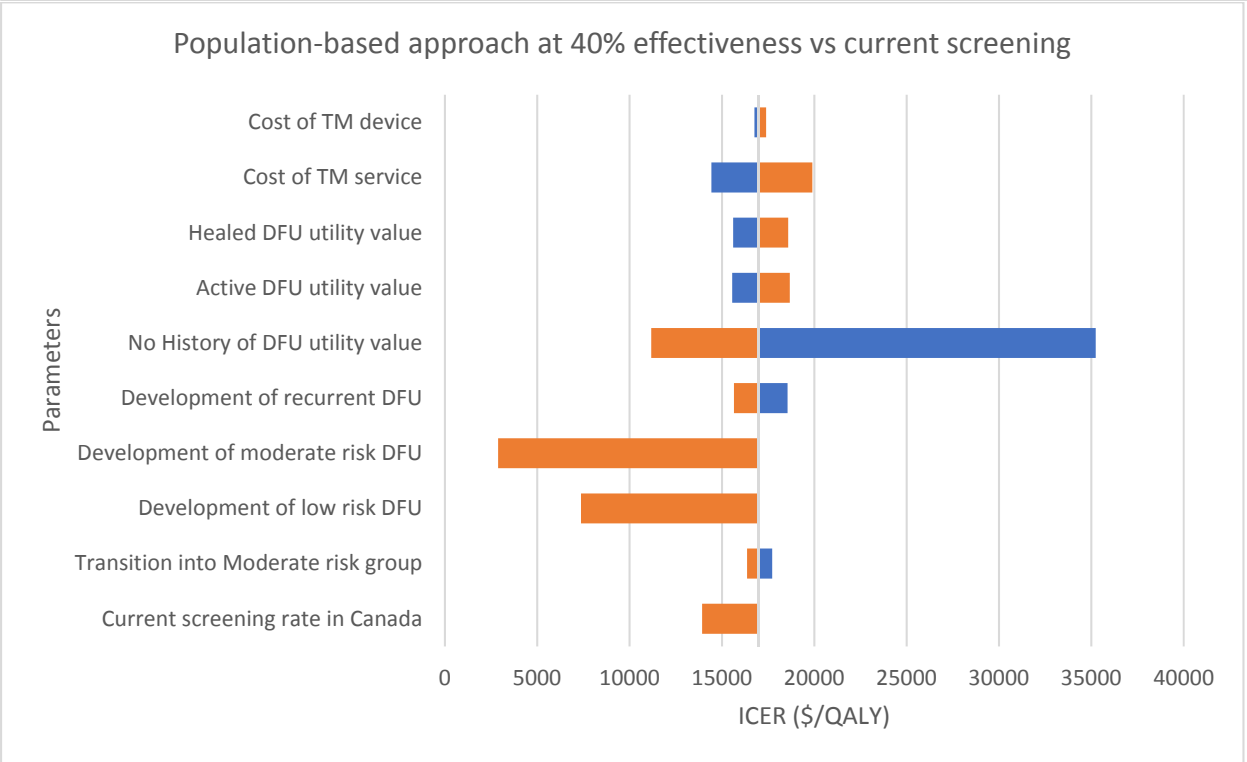

**Supplementary Figure A1:** Population-based approach one-way sensitivity analyses. Analyses were run for effectiveness values ranging from 5% to 40% in increments of 5%, but since trends changed very little only the highest and lowest effectiveness values are shown.

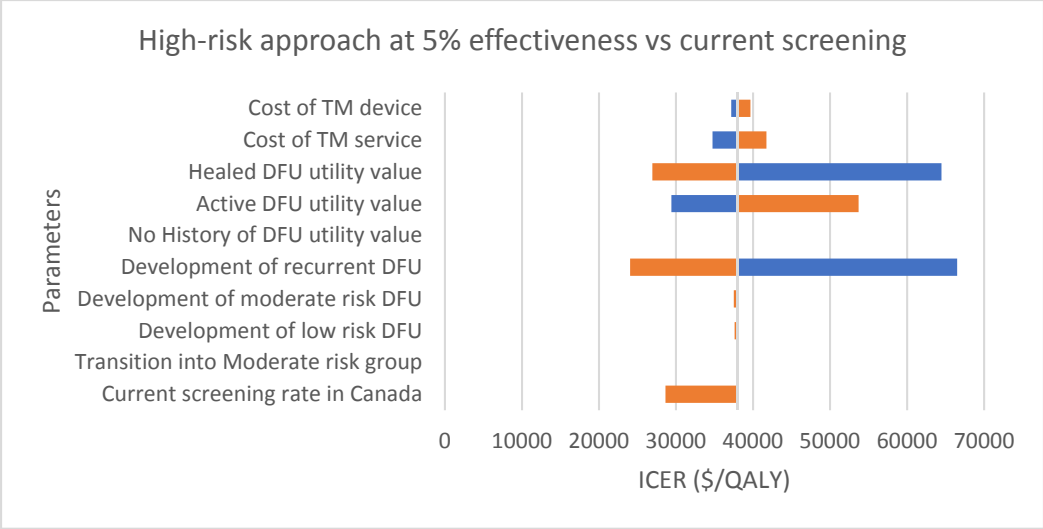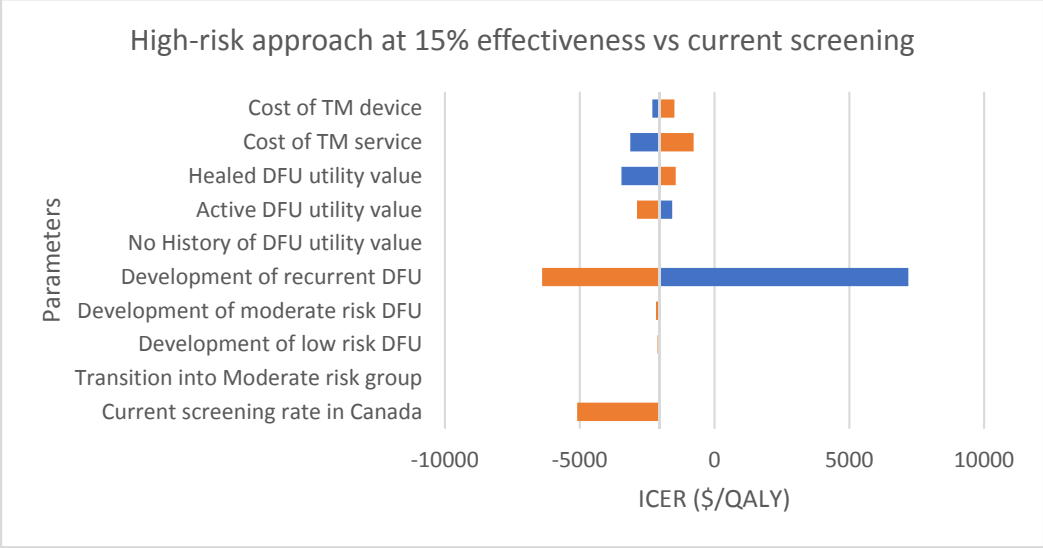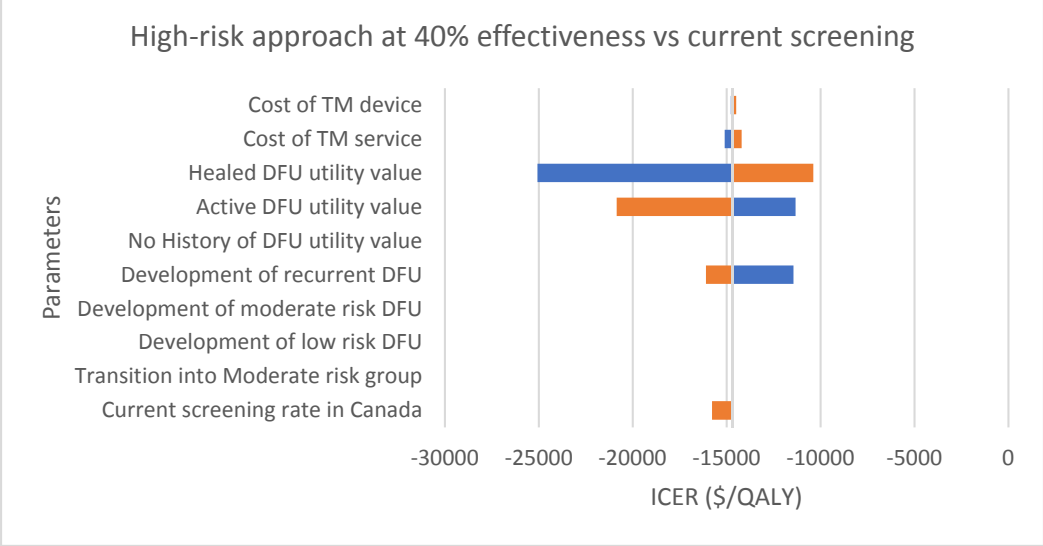

**Supplementary Figure A2:** High-risk approach one-way sensitivity analyses. Analyses were run from 5% effectiveness to 40% effectiveness in increments of 5%. Trends changed more dramatically than the population-based analysis, and representative tornado diagrams are shown.

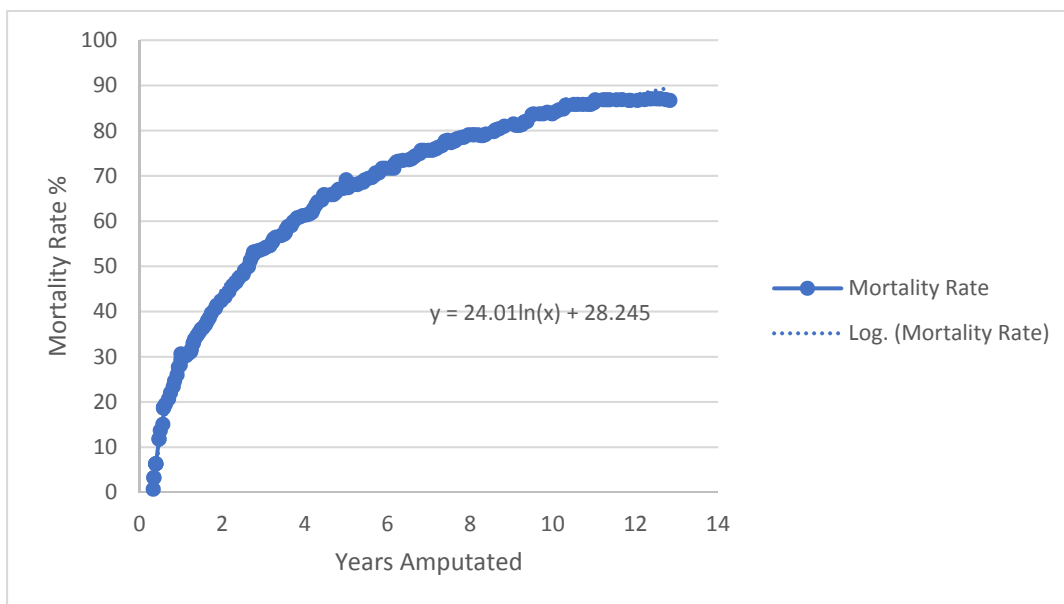

**Supplementary Figure A3:** Kaplan Meier curve derived from Aulivola et al. 2004 (20) and Fortington et al. 2013 (21) mortality rates for diabetics with lower extremity amputations.

## Supplementary Information References

1. Eddy DM, Hollingworth W, Caro JJ, Tsevat J, McDonald KM, Wong JB. Model Transparency and Validation: A Report of the ISPOR-SMDM Modeling Good Research Practices Task Force-7. *Value Health*. 2012 Sep;15(6):843–50.
2. Bus SA, van Netten JJ. A shift in priority in diabetic foot care and research: 75% of foot ulcers are preventable. *Diabetes Metab Res Rev*. 2016 Jan 1;32:195–200.
3. Tennvall GR, Apelqvist J. Prevention of diabetes-related foot ulcers and amputations: a cost-utility analysis based on Markov model simulations. *Diabetologia*. 2001;44(11):2077–2087.
4. Prompers L, Schaper N, Apelqvist J, Edmonds M, Jude E, Mauricio D, et al. Prediction of outcome in individuals with diabetic foot ulcers: focus on the differences between individuals with and without peripheral arterial disease. The EURODIALE Study. *Diabetologia*. 2008 May;51(5):747–55.
5. Ortegon MM, Redekop WK, Niessen LW. Cost-effectiveness of prevention and treatment of the diabetic foot. *Diabetes Care*. 2004;27(4):901–907.
6. Barshes NR, Saedi S, Wrobel J, Koungias P, Kundakcioglu OE, Armstrong DG. A model to estimate cost-savings in diabetic foot ulcer prevention efforts. *J Diabetes Complications*. 2017 Apr;31(4):700–7.
7. Botros M, Kuhnke JL, Embil J, Goettl K, Morin C, Parsons L, et al. Prevention and Management of diabetic foot [Internet]. *Wounds Canada*; 2017 [cited 2017 May 15]. Available from: <https://www.woundscanada.ca/docman/public/health-care-professional/bpr-workshop/560-bpr-prevention-and-management-of-diabetic-foot-ulcers/file>
8. American Diabetes Association. Peripheral Arterial Disease (PAD) [Internet]. American Diabetes Association. 2014 [cited 2017 Jul 6]. Available from: <http://www.diabetes.org/living-with-diabetes/complications/heart-disease/peripheral-arterial-disease.html>
9. Barshes NR, Sigireddi M, Wrobel JS, Mahankali A, Robbins JM, Koungias P, et al. The system of care for the diabetic foot: objectives, outcomes, and opportunities. *Diabet Foot Ankle*. 2013 Jan;4(1):21847.
10. Mueller T, Hinterreiter F, Luft C, Poelz W, Haltmayer M, Dieplinger B. Mortality rates and mortality predictors in patients with symptomatic peripheral artery disease stratified according to age and diabetes. *J Vasc Surg*. 2014 May;59(5):1291–9.
11. Statistics Canada. Rate per 100,000 population for diabetes mellitus as underlying and contributing cause, by sex, age group, neighbourhood income quintile and province/territory, Canada, 2004 to 2008 [Internet]. Ottawa; 2014 Mar [cited 2017 Aug 8].

(Statistics Canada Catalogue no. 82-003-X). Available from:  
<http://www.statcan.gc.ca/pub/82-003-x/2014003/article/11909/tbl/tbl1-eng.htm>

12. Rice JB, Desai U, Cummings AKG, Birnbaum HG, Skornicki M, Parsons NB. Burden of diabetic foot ulcers for medicare and private insurers. *Diabetes Care*. 2014;37(3):651–658.
13. Lavery LA, Peters EJ, Williams JR, Murdoch DP, Hudson A, Lavery DC. Reevaluating the way we classify the diabetic foot. *Diabetes Care*. 2008;31(1):154–156.
14. Moulik PK, Mtonga R, Gill GV. Amputation and Mortality in New-Onset Diabetic Foot Ulcers Stratified by Etiology. *Diabetes Care*. 2003 Feb 1;26(2):491–4.
15. Oyibo SO, Jude EB, Tarawneh I, Nguyen HC, Armstrong DG, Harkless LB, et al. The effects of ulcer size and site, patient's age, sex and type and duration of diabetes on the outcome of diabetic foot ulcers. *Diabet Med*. 2001;18(2):133–138.
16. Morbach S, Furchert H, Gröblichhoff U, Hoffmeier H, Kersten K, Klauke G-T, et al. Long-Term Prognosis of Diabetic Foot Patients and Their Limbs. *Diabetes Care*. 2012 Oct 1;35(10):2021–7.
17. Örneholm H, Apelqvist J, Larsson J, Eneroth M. Recurrent and other new foot ulcers after healed plantar forefoot diabetic ulcer. *Wound Repair Regen Off Publ Wound Heal Soc Eur Tissue Repair Soc*. 2017 Apr 1;
18. Armstrong DG, Boulton AJM, Bus SA. Diabetic Foot Ulcers and Their Recurrence. *N Engl J Med*. 2017 Jun 15;376(24):2367–75.
19. Dubský M, Jirkovská A, Bem R, Fejfarová V, Skibová J, Schaper NC, et al. Risk factors for recurrence of diabetic foot ulcers: prospective follow-up analysis in the Eurodiale subgroup. *Int Wound J*. 2013 Oct;10(5):555–61.
20. Aulivola B, Hile CN, Hamdan AD, Sheahan MG, Veraldi JR, Skillman JJ, et al. Major Lower Extremity Amputation: Outcome of a Modern Series. *Arch Surg*. 2004 Apr 1;139(4):395–9.
21. Fortington LV, Geertzen JHB, van Netten JJ, Postema K, Rommers GM, Dijkstra PU. Short and Long Term Mortality Rates after a Lower Limb Amputation. *Eur J Vasc Endovasc Surg*. 2013 Jul;46(1):124–31.
22. Briggs A, Claxton K, Sculpher M. *Decision Modelling for Health Economic Evaluation*. Oxford; 2006. 237 p.
23. Beaudet A, Clegg J, Thuresson P-O, Lloyd A, McEwan P. Review of Utility Values for Economic Modeling in Type 2 Diabetes. *Value Health*. 2014 Jun;17(4):462–70.

24. Redekop WK, Stolk E, Kok E, Lovas K, Kalo Z, Busschbach J. Diabetic foot ulcers and amputations: estimates of health utility for use in cost-effectiveness analyses of new treatments. *Diabetes Metab.* 2004;30(6):549–56.
25. Canadian Institute for Health Information. Patient Cost Estimator - Methodological Notes and Glossary. Ottawa, ON; 2016.
26. Hopkins RB, Burke N, Harlock J, Jegathisawaran J, Goeree R. Economic burden of illness associated with diabetic foot ulcers in Canada. *BMC Health Serv Res.* 2015 Dec;15(1):13.
27. Ministry of Health and Long Term Care. Schedule of Benefits: Physician Services Under the Health Insurance Act [Internet]. [cited 2017 Jun 14]. Available from: [http://www.health.gov.on.ca/en/pro/programs/ohip/sob/physserv/sob\\_master20151221.pdf](http://www.health.gov.on.ca/en/pro/programs/ohip/sob/physserv/sob_master20151221.pdf)
28. Ernst & Young. Financial statements - Ontario Telemedicine Network [Internet]. Ernst & Young; 2016. Available from: <https://otn.ca/wp-content/uploads/2016/10/otn-audited-financial-statements-2015-2016.pdf>
29. FASTERHOLDT I, GERSTRØM M, RASMUSSEN BSB, YDERSTRÆDE KB, KIDHOLM K, PEDERSEN KM. Cost-effectiveness of telemonitoring of diabetic foot ulcer patients. *Health Informatics J.* 2016 Sep 16;1460458216663026.
30. Canadian Institute for Health Information. Patient Cost Estimator - Methodological Notes and Glossary. Ottawa, ON; 2016.
