# Supplementary material
Source: PubMed Central journal article supplement (PMC6201712)
Supplement: supp_6.4.E486_original-submission.pdf [file supp_6.4.E486_original-submission.pdf]

1  
2  
3  
4  
5  
6  
7  
8  
9  
10  
11  
12 **Preparing for the coming tsunami: telemonitoring can be a cost-effective way to screen for**  
13 **diabetic foot complications**  
14  
15  
16  
17

18 Chris Boodoo, BSc.<sup>3</sup>, Julie A. Perry, PhD<sup>1</sup>, General Leung, PhD<sup>2,3</sup>, Karen M. Cross, MD,  
19 PhD<sup>1,2</sup>, Wanrudee Isaranuwachai, PhD<sup>4,5</sup>  
20  
21

22 <sup>1</sup> Division of Plastic Surgery, St. Michael's Hospital, Toronto, ON

23 <sup>2</sup> Associate Scientist, Keenan Research Centre for Biomedical Science, Toronto, ON

24 <sup>3</sup> Department of Medical Imaging, St. Michael's Hospital, Toronto, ON

25 <sup>4</sup> Centre for Excellence in Economic Analysis Research, St. Michael's Hospital, Toronto, ON

26 <sup>5</sup> Institute of Health Policy, Management and Evaluation, University of Toronto, Toronto, ON  
27  
28  
29

30 **Funding Statement:** This study was supported by grants from the Canadian Institutes of Health  
31 Research, Natural Sciences and Engineering Research Council of Canada, and the St. Michael's  
32 Foundation Translation Innovation Fund.  
33  
34  
35

36 **Competing Interests:** Authors GL and KC have an equity interest in a company developing a  
37 DFU telemonitoring device.  
38  
39  
40

41 **Running title:** Economic evaluation of telemonitoring in DFU  
42  
43

44 **Key Words:** telemonitoring, diabetic foot ulcer, health economics, cost-effectiveness analysis,  
45 early health technology assessment  
46  
47  
48

49 **Corresponding author (and requests for reprints):**

50 Wanrudee Isaranuwachai

51 St. Michael's Hospital

52 30 Bond Street

53 Toronto, Ontario M5B 1W8

54 416-864-6060 x 77074

55 isaranuwatcw@smh.ca  
56  
57  
58  
59  
60

## Abstract

### Background:

Diabetes rates are increasing worldwide, and the associated increasing cost of healthcare are undeniable. One of the most common (and costly) complications of diabetes are diabetic foot ulcers (DFUs), which often result in lower extremity amputation. While regular foot care can reduce complications, half of Canadians with diabetes do not participate in screening. In this work, we sought to evaluate the health and economic effects of using telemonitoring for DFU prevention.

### Methods:

We used Markov modeling to compare current screening standards to population-wide and targeted telemonitoring programs in a hypothetical cohort of Canadian patients aged 60 years. Intervention effectiveness, defined as rate of DFU prevention, was varied to explore cost-effectiveness using model parameters from published literature and clinical experts.

### Results:

At 20%-40% effectiveness, population-based prevention resulted in 0.01196 – 0.02369 quality-adjusted life years (QALYs) gained per person over 5 years and an incremental cost of \$479 - \$402, respectively, compared to current screening standards (incremental cost-effectiveness ratios of \$40,034 - \$16,971). At 15%-40% effectiveness, high-risk prevention resulted in a cost decrease per person over 5 years (\$1.26 - \$25.55, respectively) with health benefits of 0.00062 – 0.00174 QALYs gained.

### Interpretation:

The use of telemonitoring in the diabetic lower extremity can offer patients better quality of life and be cost effective compared to current Canadian screening practices. Future work should focus on developing and validating technologies based on objective outcome measures for remote monitoring of diabetic feet.

## INTRODUCTION

The management and care of diabetic foot ulcers (DFUs) imposes a tremendous burden on patients with diabetes, and decreases their quality of life (1). Moreover, rates of lower extremity amputation (LEA) are 22x higher in people with a DFU than in the general population (2). Up to 85% of DFU-related LEAs are preventable with frequent monitoring and prompt treatment (3–5). However, only 51% of Canadians with diabetes had a foot screen in 2009 (6), and foot care services essential to DFU prevention like chiropody and orthotic foot care are not funded in Ontario’s healthcare system (7). This gap in care has led to sporadic prevention efforts and delayed care for DFUs (8).

Some barriers to frequent screening and monitoring (travel distance, time limitations, and unorganized referrals to foot specialists) can be overcome by using technology to make medical services more accessible (known as telemedicine, TM). Telemedicine is an increasingly popular mechanism for remote monitoring of chronic conditions, and has been used successfully in diabetic populations to monitor (and improve) HbA1c levels, increase inpatient understanding of diabetes, and improve cohesion among members of health-care teams (9–12). Currently, there is mixed evidence on the effectiveness of telemedicine for monitoring DFUs, largely due to a lack of controlled studies in large cohorts (13–24). Also, no studies have examined the use of TM for the prevention of DFUs. Several technologies designed to diagnose DFUs have recently been developed, and could potentially compliment a telemedicine-based program (25–27) given enough evidence of effectiveness.

The global prevalence of diabetes is currently 8.5% (up from 4.8% in 1980) and is expected to increase (28). In 2011, total DFU-related cost in Canada was \$540M, or \$21,371 per prevalent case (29). Healthcare systems, which have traditionally been treatment-oriented and less focused on prevention, must adapt to meet increased demands and costs. While multidisciplinary efforts were found to improve patient outcomes (30), the success of these initiatives is dependent on scale of resource allocation, additional personnel, and coordination of diverse clinical teams including podiatrists, infectious disease specialists, and plastic surgeons (7,31). The lack of efficacy evidence of these specialized early-intervention programs makes funding them difficult from a policymaking perspective (32,33). The current study explored the preliminary cost-effectiveness of a TM intervention for the prevention of DFUs. Specifically, the goal was to identify effectiveness thresholds at which telemedicine prevention efforts using a device could be cost-effective in Canada.

## METHODS

The analysis and reporting were done according to Canadian Agency for Drugs and Technologies in Health guidelines and Consolidated Health Economic Evaluation Reporting Standards (34,35).

### Comparators

#### *Intervention*

The intervention was a TM device used to monitor the feet of people with diabetes remotely. TM efforts were based on number of visits to physicians annually recommended by the International Working Group on the Diabetic Foot (IWGDF) (Supplementary Information (SI) Table 1) (4, 36). We defined two approaches: 1) a high-risk intervention (a TM device given to an individual after their first DFU); and 2) population-based intervention (a TM device given before the formation of a DFU).

#### *Current Prevention Efforts in Canada (Control)*

The current prevention efforts (CPE) model was defined as in-person visits to a physician according to the number of visits annually recommended by IWGDF. The number of visits per patient were adjusted to the 51% proportion of Canadians that received foot screens as reported by the Canadian Institute for Health Information (CIHI) (6).

### Cohort and Time Horizon

The cohort were Canadians aged 60 years with diabetes and no history of DFUs. Cycle length was four months (the average time for a DFU to completely heal (37)) and the time horizon was 5 years.

### Model

A Markov model simulated the history of DFUs in Canada using Microsoft Excel version 15.41. The model (Figure 1) included 10 states: (1) person with diabetes; (2) low risk for DFU; (3) moderate risk for DFU; (4) low risk DFU; (5) moderate risk DFU; (6) healed DFU; (7) DFU recurrence; (8) amputation; (9) healed amputation; (10) death due to any cause. Cohort members started in state (1) and moved into pre-defined health states in 4-month cycles for five years. Each state had a 4-month cost estimate, and costs accumulated per time patients spent in each state. Model validation is outlined in more detail the Supplementary Information.

#### *Effectiveness*

To determine effectiveness thresholds (32), we varied the effectiveness of primary prevention efforts at three possible states: low risk for DFU, moderate risk for DFU, and healed DFU. Effectiveness was varied between 5%-40% based on clinical expert opinions, which is defined as the decrease in the number of DFUs. Specifically, the transition from a healed DFU state to a recurrent DFU state was decreased by 5%-40% (high-risk) and the transition from a low risk, moderate risk and healed DFU state to a DFU state was decreased by 5%-40% (population-based).

### *Model Parameters and outcomes*

Model parameters are listed in Table 1 and SI Table 2, including DFU incidence, amputation rates, healing rates, and mortality rates. Outcomes were expressed in quality-adjusted life years (QALYs) (38). Values were based on a review of utility values for type 2 diabetes by Beaudet, et al. 2014 (39) (see Supplementary Information). Beta distributions were used for all utility values with 1.5% discount rate (34,38).

### *Resource Use and Costs*

We used a public payer perspective of cost using sources including CIHI's Patient Cost Estimator and Ontario's Schedule of Benefits: Physician Services Under the Health Insurance Act (40,41). Costs associated with each state are listed in Table 1. Gamma distributions were used for all cost parameters with 1.5% discount rate reported in 2015 Canadian dollars (34,38). Please see the Supplementary Information for details regarding how costs were derived, such as screening, DFU treatment, and amputation.

### **Analysis**

Cost-effectiveness was explored by varying TM effectiveness and comparing results to the CPE model. Separate analyses were conducted for population-based and high-risk approaches. Results were presented as the difference in cost, difference in QALY, and incremental cost-effectiveness ratios compared to the CPE model.

### **Sensitivity analysis**

#### *Probabilistic Sensitivity Analysis (PSA)*

To explore uncertainty, Monte-Carlo simulations of 1,000 trials were conducted for population-based and CPE, and high-risk and CPE. All input parameters in the models were considered as random quantities from an associated probability distribution (38). At 30% effectiveness, the PSA results for the high-risk and population-based approaches were compared on a cost-effectiveness plane. We constructed cost-effectiveness acceptability curves (CEAC), with willingness-to-pay (WTP) thresholds of \$0-\$100,000. A variation of the CEAC was also used. Proportions of simulations resulting in cost-effectiveness at varying effectiveness levels were identified for specific WTP thresholds.

#### *One-way analysis*

One-way analyses were conducted to explore the effect on ICERs when key parameters were varied based on data in literature and expert opinion.

## **RESULTS**

We set out to evaluate the cost-effectiveness of a telemedicine (TM) intervention in a hypothetical cohort of Canadian patients aged 60 years with diabetes. A Markov cohort model was constructed including 10 states (Figure 1) and de-bugged to validate the model's functionality (see Supplementary Information for details). Outcomes from our analysis were expressed as Quality-Adjusted Life Years (QALYs) and as incremental cost-effectiveness ratio (ICERs; a value that incorporates both the difference in costs between comparators in the

1  
2  
3 numerator, and the difference in QALY in the denominator). We compared the cost-  
4 effectiveness of a using a TM device to monitor the feet of diabetics to prevent DFUs in two  
5 scenarios: 1) a population-based approach, where all diabetics are monitored, and 2) a high-risk  
6 approach, in which diabetics are monitored by TM after their first DFU is diagnosed and has  
7 healed.  
8  
9

### 10 11 12 *Population-based Approach*

13 We conducted a search of the literature to assign cost and effectiveness values to each  
14 transition state in our Markov model (Table 1) and ran the scenarios described above. We  
15 found that a population-based approach was both costlier and more effective than current DFU  
16 prevention efforts (Table 2). When effectiveness of the TM intervention increased, QALYs  
17 gained increased while incremental costs decreased. If adopting population-based TM  
18 approach decreased DFU incidence by 20%-40%, the resulting health benefit was 0.01196 –  
19 0.02369 QALYs per person, respectively. A population-based approach using TM was a more  
20 widespread screening strategy than is currently in place in Canada, which translated into  
21 incremental costs of \$479 - \$402 per person and ICERs of \$40,034 - \$16,971, respectively.  
22  
23  
24

### 25 *High-risk Approach*

26 People with diabetes who have had a DFU are more likely to develop subsequent ulcers. Our  
27 second approach analyzed DFU recurrence and evaluated the cost and effectiveness of TM  
28 prevention after a patient healed from their first DFU. We found that screening a high-risk  
29 population was slightly less costly and more effective compared to current DFU prevention  
30 efforts at 15% effectiveness (Table 1). As expected, when effectiveness of DFU prevention  
31 increased, there was also an increase in cost-savings and QALYs gained. Over 5 years with  
32 effectiveness of 15%-40%, people in this cohort had a health benefit of 0.00062 – 0.00174  
33 QALYs per person while costs decreased by \$1.26 - \$25.55 per person, respectively.  
34  
35  
36

### 37 *Sensitivity analysis*

38 We next compared the Monte-Carlo simulation of 1,000 trials at 30% effectiveness for the  
39 population-based and the high-risk approach (Figure 2). The majority of simulations for the  
40 population-based approach resulted in more QALYs and higher costs, since more people were  
41 screened. We also found that some simulations from both approaches resulted in less QALYs  
42 than the CPE model, which is attributed to uncertainty in utility values. The costs in these cases  
43 were consistent with simulations that resulted in QALYs gained. We also conducted Monte  
44 Carlo simulations for all models (please see Supplementary Information for details).  
45  
46  
47

### 48 *Identifying Highest Probability of Cost-effectiveness*

49 Although the population-based approach was more effective at preventing DFUs, the cost of  
50 such an approach was intuitively higher. To determine the WTP threshold at which a  
51 population-based approach was more likely to have a lower ICER than the high-risk approach,  
52 we calculated the probability of cost-effectiveness for both population-based and high-risk  
53 approaches at 30% effectiveness. The results showed that a high-risk screening strategy had a  
54 higher probability than the population-based approach of being cost-effective up to a WTP  
55  
56  
57  
58  
59  
60

1  
2  
3 threshold of \$66,500/QALY gained (Figure 3). Beyond that threshold, the population-based  
4 approach had a higher probability than the high-risk approach. We next varied effectiveness  
5 levels at defined WTPs (Figure 4). Not surprisingly, increasing the effectiveness of the  
6 intervention increased the probability of cost-effectiveness for both the high-risk and  
7 population-based approaches. At a WTP of \$100,000 and effectiveness above 15%, the  
8 population-based approach had a higher probability of cost-effectiveness than the high-risk  
9 approach.  
10

11 Further analyses summarizing the effects of varying parameters related to cost of TM, DFU  
12 utility state values, and DFU incidence rates can be found in Supplementary Information Figure  
13 SI1 and SI2. Influential parameters were utility values for healed DFU, active DFU, no history of  
14 DFU, and incidence rates for low risk, moderate risk, and recurrent DFUs.  
15  
16  
17  
18

## 19 **INTERPRETATION**

20 As the Canadian population ages, the strategic allocation of resources in our healthcare system  
21 becomes increasingly important. By 2020, an estimated 3.7 million Canadians will have  
22 diabetes, with an associated cost of nearly \$17 billion (42). Diabetes accounted for 3.5% of  
23 Canadian healthcare spending in 2005 (42), including an estimated \$547 million dollars on DFU  
24 care (29). Cost of a single DFU case was \$52,360, including costs of admissions, ER and clinic  
25 visits, drugs and dressings, home and long-term care (29).  
26  
27  
28

29 TM is an increasingly popular mechanism for remote monitoring of chronic conditions, and has  
30 been applied successfully in diabetics (9–12). In this work, we sought to evaluate the health  
31 and economic effects of using TM to prevent DFUs. Given that a history of DFUs is associated  
32 with an increased risk for future ulcers, we stratified our analysis into 1) population-wide or 2)  
33 targeted screening approaches. Although the absolute effect of TM-based screening on DFU  
34 incidence is unknown without clinical data, the potential health benefit associated with  
35 population-based screening was appreciable, ranging from 0.01196 – 0.02369 QALYs per person  
36 at a conservative effectiveness of 20%-40%. For context, screening for hepatitis C in Canada  
37 reported QALY increase of 0.0032 - 0.0095 per person (43). However, population-based  
38 screening is a more widespread strategy than is currently in place in Canada, and would result  
39 in incremental costs of \$479 - \$402 per person over 5 years. In contrast, we found that  
40 implementing a TM strategy following a patient's first DFU had a high probability of being cost-  
41 effective while also slightly increasing quality of life (health benefit of 0.00062 – 0.00174 QALYs  
42 per person; decreasing costs of \$1.26 - \$25.55 per person at 15%-40% effectiveness,  
43 respectively). Cost savings were attributed to a reduction DFU recurrences and complications,  
44 which is enhanced when screening is more effective at preventing recurrence. As fewer  
45 screening devices are required in the high-risk approach, the up-front cost to the healthcare  
46 system are lower, and targeting a group of patients with higher chances of DFU formation  
47 eliminates waste.  
48  
49  
50  
51  
52

## 53 *Limitations*

54 Our analysis was based on data from various sources, but there is a lack of data on DFU  
55 prevalence and associated costs in Canada. We used conservative parameter estimates for DFU  
56  
57  
58  
59  
60

1  
2  
3 incidence to avoid inflated results, and therefore our models may underestimate the impact TM  
4 has on the preventing DFUs (44). Moreover, costing data available for this study does not  
5 encompass all costs associated with DFUs. For example, costs of the 'DFU state' in our model  
6 only included the cost of physician services and treatment in hospital-based acute care.  
7 However, not all DFUs are treated on an inpatient-basis. An analysis using outpatient clinic and  
8 homecare costs would likely result in greater cost-effectiveness as cost-savings from prevention  
9 would increase, but data in these realms of patient care is not available. Furthermore, indirect  
10 cost from a societal perspective was not included, such as productivity loss (45) and travel costs  
11 incurred to the patients.  
12  
13  
14

15 Also, the models constructed were simplified representations of DFUs. DFUs require  
16 personalized care since wounds can progress through various stages during the healing process,  
17 including potential for infection and surgical debridement (3). It is unknown how this would  
18 change our results. Furthermore, the age of the cohort simulated was 60 because model  
19 parameters were sourced from observational studies on patients with this average age.  
20 However, DFUs occur in patients with diabetes across all age groups (46). Lower rates of DFU  
21 incidence would increase ICERs and while higher rates would improve ICERs. Subgroup analyses  
22 should be explored in future studies. This analysis should be considered an early health  
23 technology assessment given the lack of important data on various parameters. The findings,  
24 however, represent the first piece of evidence on this important solution to a growing problem.  
25  
26  
27  
28  
29

### 30 *Conclusion and future directions*

31 Rising rates of diabetes have been likened to an impending global tsunami. Healthcare systems  
32 must find a way to re-focus care away from the reactionary and turn to prevention. The use of  
33 TM in the diabetic lower extremity can be an economically attractive alternative to current  
34 screening practices in Canada. Future work should focus on developing and validating  
35 technologies based on objective outcome measures for remote TM of diabetic feet.  
36  
37  
38  
39  
40  
41  
42  
43  
44  
45  
46  
47  
48  
49  
50  
51  
52  
53  
54  
55  
56  
57  
58  
59  
60



## References

1. Siersma V, Thorsen H, Holstein PE, Kars M, Apelqvist J, Jude EB, et al. Importance of factors determining the low health-related quality of life in people presenting with a diabetic foot ulcer: the Eurodiale study. *Diabet Med*. 2013 Nov;30(11):1382–7.
2. Buckley CM, O’Farrell A, Canavan RJ, Lynch AD, Harpe DVDL, Bradley CP, et al. Trends in the Incidence of Lower Extremity Amputations in People with and without Diabetes over a Five-Year Period in the Republic of Ireland. *PLOS ONE*. 2012 Jul 31;7(7):e41492.
3. Bowering K, Embil JM. The Canadian Diabetes Association 2013 Clinical Practice Guidelines for the Prevention and Management of Diabetes in Canada: foot care. *Can J Diabetes*. 2013;37(suppl 1):S145–9.
4. Bus SA, van Netten JJ, Lavery LA, Monteiro-Soares M, Rasmussen A, Jubiz Y, et al. IWGDF guidance on the prevention of foot ulcers in at-risk patients with diabetes. *Diabetes Metab Res Rev*. 2016 Jan;32 Suppl 1:16–24.
5. Singh N, Armstrong DG, Lipsky BA. Preventing foot ulcers in patients with diabetes. *Jama*. 2005;293(2):217–228.
6. Canadian Institute for Health Information. Diabetics Care Gaps and Disparities in Canada [Internet]. Ottawa; 2009. Available from: <https://secure.cihi.ca/estore/productFamily.htm?pf=PFC1387&lang=en&media=0>
7. Lysy Z. Prevention of diabetic foot ulcers: The bottlenecks in the pathway. *Diabet Foot Can*. 2014;2:38–40.
8. Barshes NR, Sigireddi M, Wrobel JS, Mahankali A, Robbins JM, Kougiias P, et al. The system of care for the diabetic foot: objectives, outcomes, and opportunities. *Diabet Foot Ankle*. 2013 Jan;4(1):21847.
9. Siminerio LM, Piatt G, Zgibor JC. Implementing the Chronic Care Model for Improvements in Diabetes Care and Education in a Rural Primary Care Practice. *Diabetes Educ*. 2005 Mar 1;31(2):225–34.
10. Corser W, Xu Y. Facilitating Patients’ Diabetes Self-Management: A Primary Care Intervention Framework. *J Nurs Care Qual*. 2009 Jun;24(2):172.
11. Griffith ML, Siminerio L, Payne T, Krall J. A Shared Decision-Making Approach to Telemedicine: Engaging Rural Patients in Glycemic Management. *J Clin Med*. 2016 Nov 17;5(11):103.
12. Bonoto BC, Araújo VE de, Godói IP, Lemos LLP de, Godman B, Bennie M, et al. Efficacy of Mobile Apps to Support the Care of Patients With Diabetes Mellitus: A Systematic Review and Meta-Analysis of Randomized Controlled Trials. *JMIR MHealth UHealth*. 2017;5(3):e4.

13. Terry M, Halstead LS, O'hare P, Gaskill C, Ho PS, Obecny J, et al. Feasibility study of home care wound management using telemedicine. *Adv Skin Wound Care*. 2009;22(8):358–364.
14. Ameen J, Coll AM, Peters M. Impact of tele-advice on community nurses' knowledge of venous leg ulcer care. *J Adv Nurs*. 2005 Jun;50(6):583–94.
15. Vowden K, Vowden P. A pilot study on the potential of remote support to enhance wound care for nursing-home patients. *J Wound Care*. 2013 Sep;22(9):481–8.
16. Dobke M, Bhavsar D, Gosman A, De Neve J, Neve DB. Pilot Trial of Telemedicine as a Decision Aid for Patients with Chronic Wounds | Abstract. *Telemed E-Health*. 2008 Apr;14(3):245–9.
17. Santamaria N, Carville K, Ellis I, Prentice J. The effectiveness of digital imaging and remote expert wound consultation on healing rates in chronic lower leg ulcers in the Kimberley region of Western Australia. *Prim Intent*. 2004;2:62–70.
18. Finkelstein SM, Speedie SM, Demiris G, Veen M, Lundgren JM, Potthoff S. Telehomecare: Quality, Perception, Satisfaction. *Telemed E-Health*. 2005 Jan;10(2):122–8.
19. Wilbright WA, Birke JA, Patout CA, Varnado M, Horswell R. The use of telemedicine in the management of diabetes-related foot ulceration: a pilot study. *Adv Skin Wound Care*. 2004;17(5):232–238.
20. Rasmussen BSB, Froekjaer J, Bjerregaard MR, Lauritsen J, Hangaard J, Henriksen CW, et al. A Randomized Controlled Trial Comparing Telemedical and Standard Outpatient Monitoring of Diabetic Foot Ulcers. *Diabetes Care*. 2015 Sep 1;38(9):1723–9.
21. Muller M, David-Tchouda S, Margier J, Oreglia M, Benhamou P-Y. Comment on Rasmussen et al. A Randomized Controlled Trial Comparing Telemedical and Standard Outpatient Monitoring of Diabetic Foot Ulcers. *Diabetes Care*. 2016 Jan 1;39(1):e9–10.
22. Chanussot-deprez C, Contreras-ruiz J. Telemedicine in Wound Care: A Review. *Adv Skin Wound Care*. 2013 Feb 1;26(2):78–82.
23. Sood A, Granick MS, Trial C, Lano J, Palmier S, Ribal E, et al. The Role of Telemedicine in Wound Care: A Review and Analysis of a Database of 5,795 Patients from a Mobile Wound-healing Center in Languedoc-roussillon, France. *Plast Reconstr Surg*. 2016 Sep 1;138(Suppl. 3):248S–56S.
24. Vyas KS, Hambrick HR, Shakir A, Morrison SD, Tran DC, Pearson K, et al. A Systematic Review of the Use of Telemedicine in Plastic and Reconstructive Surgery and Dermatology. *Ann Plast Surg*. 2017 Jun 1;78(6):736–68.

- 1  
2  
3 25. Hazenberg CEVB, van Netten JJ, Van Baal JG, Bus SA. Assessment of Signs of Foot Infection  
4 in Diabetes Patients Using Photographic Foot Imaging and Infrared Thermography.  
5 *Diabetes Technol Ther.* 2014 May;16(6):370–7.  
6
- 7  
8 26. Goyal M, Reeves ND, Rajbhandari S, Spragg J, Yap MH. Fully Convolutional Networks for  
9 Diabetic Foot Ulcer Segmentation. *arXiv [Internet]*. 2017 [cited 2017 Aug 18]; Available  
10 from: <https://arxiv.org/abs/1708.01928>  
11
- 12 27. Armstrong DG, Holtz-Neiderer K, Wendel C, Mohler MJ, Kimbriel HR, Lavery LA. Skin  
13 Temperature Monitoring Reduces the Risk for Diabetic Foot Ulceration in High-risk  
14 Patients. *Am J Med.* 2007 Dec;120(12):1042–6.  
15
- 16 28. Roglic G, World Health Organization, editors. *Global report on diabetes*. Geneva,  
17 Switzerland: World Health Organization; 2016. 86 p.  
18
- 19 29. Hopkins RB, Burke N, Harlock J, Jegathisawaran J, Goeree R. Economic burden of illness  
20 associated with diabetic foot ulcers in Canada. *BMC Health Serv Res.* 2015 Dec;15(1):13.  
21
- 22 30. Yazdanpanah L, Nasiri M, Adarvishi S. Literature review on the management of diabetic  
23 foot ulcer. *World J Diabetes.* 2015 Feb 15;6(1):37–53.  
24
- 25 31. Hinchliffe RJ, Brownrigg JRW, Apelqvist J, Boyko EJ, Fitridge R, Mills JL, et al. IWGDF  
26 guidance on the diagnosis, prognosis and management of peripheral artery disease in  
27 patients with foot ulcers in diabetes. *Diabetes Metab Res Rev.* 2016 Jan 1;32(Suppl. 1):37–  
28 44.  
29
- 30 32. van Netten JJ, Price PE, Lavery LA, Monteiro-Soares M, Rasmussen A, Jubiz Y, et al.  
31 Prevention of foot ulcers in the at-risk patient with diabetes: a systematic review:  
32 Prevention of Foot Ulcers in the at-risk Patient with Diabetes. *Diabetes Metab Res Rev.*  
33 2016 Jan;32(Suppl. 1):84–98.  
34
- 35 33. Hoogeveen RC, Dorresteyn JAN, Kriegsman DMW, Valk GD. Complex interventions for  
36 preventing diabetic foot ulceration. *Cochrane Database Syst Rev.* 2015 Aug  
37 24;(8):CD007610.  
38
- 39 34. CADTH. *Guidelines for the Economic Evaluation of Health Technologies: Canada*. Ottawa;  
40 2017. Report No.: 4th ed.  
41
- 42 35. Husereau D, Drummond M, Petrou S, Carswell C, Moher D, Greenberg D, et al.  
43 Consolidated health economic evaluation reporting standards (CHEERS)—explanation and  
44 elaboration: a report of the ISPOR health economic evaluation publication guidelines good  
45 reporting practices task force. *Value Health.* 2013;16(2):231–250.  
46
- 47 36. Botros M, Kuhnke JL, Embil J, Goettl K, Morin C, Parsons L, et al. Prevention and  
48 Management of diabetic foot [Internet]. *Wounds Canada*; 2017 [cited 2017 May 15].  
49 Available from: <https://www.woundscanada.ca/docman/public/health-care->  
50  
51  
52  
53  
54  
55  
56  
57  
58  
59  
60

- 1  
2  
3 professional/bpr-workshop/560-bpr-prevention-and-management-of-diabetic-foot-  
4 ulcers/file  
5  
6  
7 37. Zimny S, Schatz H, Pfohl M. Determinants and estimation of healing times in diabetic foot  
8 ulcers. *J Diabetes Complications*. 2002 Sep 1;16(5):327–32.  
9  
10 38. Briggs A, Claxton K, Sculpher M. *Decision Modelling for Health Economic Evaluation*.  
11 Oxford; 2006. 237 p.  
12  
13 39. Beaudet A, Clegg J, Thuresson P-O, Lloyd A, McEwan P. Review of Utility Values for  
14 Economic Modeling in Type 2 Diabetes. *Value Health*. 2014 Jun;17(4):462–70.  
15  
16 40. Canadian Institute for Health Information. *Patient Cost Estimator - Methodological Notes*  
17 *and Glossary*. Ottawa, ON; 2016.  
18  
19 41. Ministry of Health and Long Term Care. *Schedule of Benefits: Physician Services Under the*  
20 *Health Insurance Act* [Internet]. [cited 2017 Jun 14]. Available from:  
21 [http://www.health.gov.on.ca/en/pro/programs/ohip/sob/physserv/sob\\_master20151221.](http://www.health.gov.on.ca/en/pro/programs/ohip/sob/physserv/sob_master20151221.pdf)  
22 [pdf](http://www.health.gov.on.ca/en/pro/programs/ohip/sob/physserv/sob_master20151221.pdf)  
23  
24  
25 42. Canadian Diabetes Association. *An economic tsunami: the cost of diabetes in Canada*.  
26 2009.  
27  
28 43. Wong WWL, Tu H-A, Feld JJ, Wong T, Krahn M. Cost-effectiveness of screening for  
29 hepatitis C in Canada. *Can Med Assoc J*. 2015 Feb 17;187(3):E110–21.  
30  
31 44. Lavery LA, Peters EJ, Williams JR, Murdoch DP, Hudson A, Lavery DC. Reevaluating the way  
32 we classify the diabetic foot. *Diabetes Care*. 2008;31(1):154–156.  
33  
34 45. Public Health Agency of Canada. *Diabetes in Canada: Facts and figures from a public health*  
35 *perspective - Public Health Agency of Canada* [Internet]. 2011 [cited 2017 May 10].  
36 Available from: [http://www.phac-aspc.gc.ca/cd-mc/publications/diabetes-diabete/facts-](http://www.phac-aspc.gc.ca/cd-mc/publications/diabetes-diabete/facts-figures-faits-chiffres-2011/highlights-saillants-eng.php)  
37 [figures-faits-chiffres-2011/highlights-saillants-eng.php](http://www.phac-aspc.gc.ca/cd-mc/publications/diabetes-diabete/facts-figures-faits-chiffres-2011/highlights-saillants-eng.php)  
38  
39  
40  
41 46. Margolis DJ, Malay DS, Hoffstad OJ, Leonard CE, MaCurdy T, de Nava KL, et al. Incidence of  
42 diabetic foot ulcer and lower extremity amputation among Medicare beneficiaries, 2006  
43 to 2008: Data Points #2 [Internet]. Rockville (MD): Agency for Healthcare Research and  
44 Quality (US); 2011. Available from: <http://www.ncbi.nlm.nih.gov/books/NBK65149/>  
45  
46  
47  
48 47. Armstrong DG, Boulton AJM, Bus SA. Diabetic Foot Ulcers and Their Recurrence. *N Engl J*  
49 *Med*. 2017 Jun 15;376(24):2367–75.  
50  
51 48. Dubský M, Jirkovská A, Bem R, Fejfarová V, Skibová J, Schaper NC, et al. Risk factors for  
52 recurrence of diabetic foot ulcers: prospective follow-up analysis in the Eurodiale  
53 subgroup. *Int Wound J*. 2013 Oct;10(5):555–61.  
54  
55  
56  
57  
58  
59  
60

- 1
  - 2
  - 3
  - 4
  - 5
  - 6
  - 7
  - 8
  - 9
  - 10
  - 11
  - 12
  - 13
  - 14
  - 15
  - 16
  - 17
  - 18
  - 19
  - 20
  - 21
  - 22
  - 23
  - 24
  - 25
  - 26
  - 27
  - 28
  - 29
  - 30
  - 31
  - 32
  - 33
  - 34
  - 35
  - 36
  - 37
  - 38
  - 39
  - 40
  - 41
  - 42
  - 43
  - 44
  - 45
  - 46
  - 47
  - 48
  - 49
  - 50
  - 51
  - 52
  - 53
  - 54
  - 55
  - 56
  - 57
  - 58
  - 59
  - 60
49. Prompers L, Schaper N, Apelqvist J, Edmonds M, Jude E, Mauricio D, et al. Prediction of outcome in individuals with diabetic foot ulcers: focus on the differences between individuals with and without peripheral arterial disease. The EURODIALE Study. *Diabetologia*. 2008 May;51(5):747–55.
50. Örneholm H, Apelqvist J, Larsson J, Eneroth M. Recurrent and other new foot ulcers after healed plantar forefoot diabetic ulcer. *Wound Repair Regen Off Publ Wound Heal Soc Eur Tissue Repair Soc*. 2017 Apr 1;
51. Moulik PK, Mtonga R, Gill GV. Amputation and Mortality in New-Onset Diabetic Foot Ulcers Stratified by Etiology. *Diabetes Care*. 2003 Feb 1;26(2):491–4.
52. Morbach S, Furchert H, Gröblichhoff U, Hoffmeier H, Kersten K, Klauke G-T, et al. Long-Term Prognosis of Diabetic Foot Patients and Their Limbs. *Diabetes Care*. 2012 Oct 1;35(10):2021–7.
53. Oyibo SO, Jude EB, Tarawneh I, Nguyen HC, Armstrong DG, Harkless LB, et al. The effects of ulcer size and site, patient’s age, sex and type and duration of diabetes on the outcome of diabetic foot ulcers. *Diabet Med*. 2001;18(2):133–138.
54. Aulivola B, Hile CN, Hamdan AD, Sheahan MG, Veraldi JR, Skillman JJ, et al. Major Lower Extremity Amputation: Outcome of a Modern Series. *Arch Surg*. 2004 Apr 1;139(4):395–9.
55. Redekop WK, Stolk E, Kok E, Lovas K, Kalo Z, Busschbach J. Diabetic foot ulcers and amputations: estimates of health utility for use in cost-effectiveness analyses of new treatments. *Diabetes Metab*. 2004;30(6):549–56.
56. FASTERholdt I, Gerstrøm M, Rasmussen BSB, Yderstræde KB, Kidholm K, Pedersen KM. Cost-effectiveness of telemonitoring of diabetic foot ulcer patients. *Health Informatics J*. 2016 Sep 16;1460458216663026.
57. Ernst & Young. Financial statements - Ontario Telemedicine Network [Internet]. Ernst & Young; 2016. Available from: <https://otn.ca/wp-content/uploads/2016/10/otn-audited-financial-statements-2015-2016.pdf>

## Tables and Figures

**Table 1.** Summary of key model parameters over a 4-month period

| Variable/State                           | Value (Range)                                  | Reference              |
|------------------------------------------|------------------------------------------------|------------------------|
| <b>Transition Probabilities</b>          |                                                |                        |
| Rate of developing low risk DFU, %       | 0.3% (0.3 - 0.41)                              | (44)                   |
| Rate of developing moderate risk DFU, %  | 0.45% (0.45 - 2.18)                            | (44)                   |
| Rate of developing recurrent DFU, %      | 11.21% (7.17 - 15.66)                          | (47), (48)             |
| Healing rate for low risk DFU, %         | 45.71%                                         | (49)                   |
| Healing rate for moderate risk DFU, %    | 32.32%                                         | (49)                   |
| Healing rate for recurrent DFU, %        | 11.51%                                         | (50)                   |
| Amputation rate for low risk DFU, %      | 0.67% (0.3 - 0.77)                             | (44), (49), (51)       |
| Amputation rate for moderate risk DFU, % | 2.74% (0.063 - 8.54)                           | (44), (49), (52), (53) |
| Amputation rate for recurrent DFU, %     | 3.45% (0.68 - 3.45)                            | (44), (50)             |
| Mortality rate for low risk DFU, %       | 1.17% (1.01 - 2.73)                            | (49), (52)             |
| Mortality rate for moderate risk DFU, %  | 3.26% (3.26 - 8.07)                            | (49), (52)             |
| Mortality rate for recurrent DFU, %      | 3.26% (3.26 - 8.07)                            | (49), (50), (52),      |
| Mortality rate for amputation            | See Supplementary Figure 3, Kaplan-Meier curve | (54)                   |
| <b>Utilities or Cost*</b>                |                                                |                        |
| No Ulcer                                 | 0.7850 (0.681 - 0.889)                         | (39)                   |
| Active DFU                               | 0.615 (0.578 - 0.652)                          | (39)                   |
| Healed DFU                               | 0.680                                          | (55)                   |
| Amputation                               | 0.505 (0.396 - 0.615)                          | (39)                   |
| Initial Screen                           | \$60                                           | (41)                   |
| At low risk for DFU                      | \$67.80                                        | (41)                   |
| At moderate risk for DFU                 | \$85.87                                        | (41)                   |
| DFU                                      | \$2,395.75                                     | (41), (40)             |
| Amputation                               | \$16,752.15                                    | (41), (40)             |
| Healed Amputation                        | \$78.40                                        | (41), (40)             |
| Healed DFU                               | \$135.60                                       | (41)                   |
| TM device                                | \$20.00                                        | (56)                   |
| TM service                               | \$14.65                                        | (57)                   |

\*All cost in 2015 Canadian Dollars.

**Table 2.** Estimated cost-effectiveness for population-based and high-risk approach DFU prevention using TM at varying levels of effectiveness.

| High-risk Approach        |                   |                                    |                  |                       |                           |                                             |
|---------------------------|-------------------|------------------------------------|------------------|-----------------------|---------------------------|---------------------------------------------|
| RR for DFUs               | Effectiveness (%) | Quality-Adjusted Life Years (QALY) | Cost, 2015 Can\$ | Incremental Cost (\$) | Incremental Effect (QALY) | Incremental Cost-Effectiveness Ratio (QALY) |
| 0                         | 0                 | 10.95213                           | 732.42           | -                     | -                         | -                                           |
| 0.95                      | 5                 | 10.95233                           | 740.12           | 7.70                  | 0.00020                   | 38,005.72                                   |
| 0.9                       | 10                | 10.95254                           | 735.69           | 3.27                  | 0.00041                   | 7,995.00                                    |
| 0.85                      | 15                | 10.95275                           | 731.16           | -1.26                 | 0.00062                   | Dominant                                    |
| 0.8                       | 20                | 10.95296                           | 726.53           | -5.89                 | 0.00083                   | Dominant                                    |
| 0.75                      | 25                | 10.95318                           | 721.78           | -10.63                | 0.00105                   | Dominant                                    |
| 0.7                       | 30                | 10.95341                           | 716.93           | -15.49                | 0.00128                   | Dominant                                    |
| 0.65                      | 35                | 10.95363                           | 711.96           | -20.46                | 0.00151                   | Dominant                                    |
| 0.6                       | 40                | 10.95387                           | 706.87           | -25.55                | 0.00174                   | Dominant                                    |
| Population-based Approach |                   |                                    |                  |                       |                           |                                             |
| 0.95                      | 5                 | 10.95514                           | 1,272.41         | 539.99                | 0.00301                   | 179,475.12                                  |
| 0.9                       | 10                | 10.95813                           | 1,252.67         | 519.25                | 0.00601                   | 86,468.75                                   |
| 0.85                      | 15                | 10.96112                           | 1,231.25         | 498.83                | 0.00899                   | 55,496.76                                   |
| 0.8                       | 20                | 10.96409                           | 1,211.17         | 478.75                | 0.01196                   | 40,034.44                                   |
| 0.75                      | 25                | 10.96704                           | 1,191.43         | 459.01                | 0.01491                   | 30,776.87                                   |
| 0.7                       | 30                | 10.97000                           | 1,172.06         | 439.64                | 0.01786                   | 24,622.45                                   |
| 0.65                      | 35                | 10.97291                           | 1,153.07         | 420.65                | 0.02078                   | 20,241.98                                   |
| 0.6                       | 40                | 10.97582                           | 1,134.48         | 402.06                | 0.02369                   | 16,970.87                                   |

Dominant = less costly and more effective

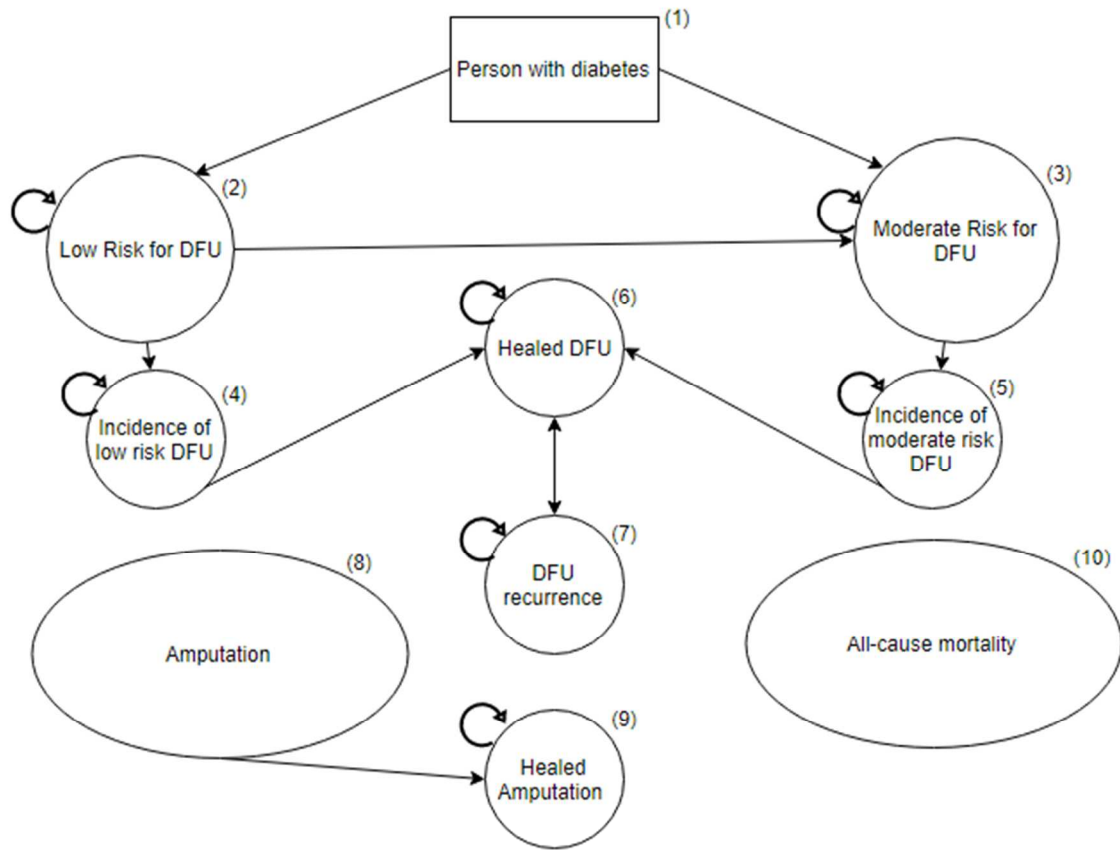

**Figure 1.** Markov model of DFU incidence and progression. All states can also transition to the amputation state, and all states can be absorbed by the death state (not shown). For details on each health state, see [Supplementary Information—Methods 2](#).



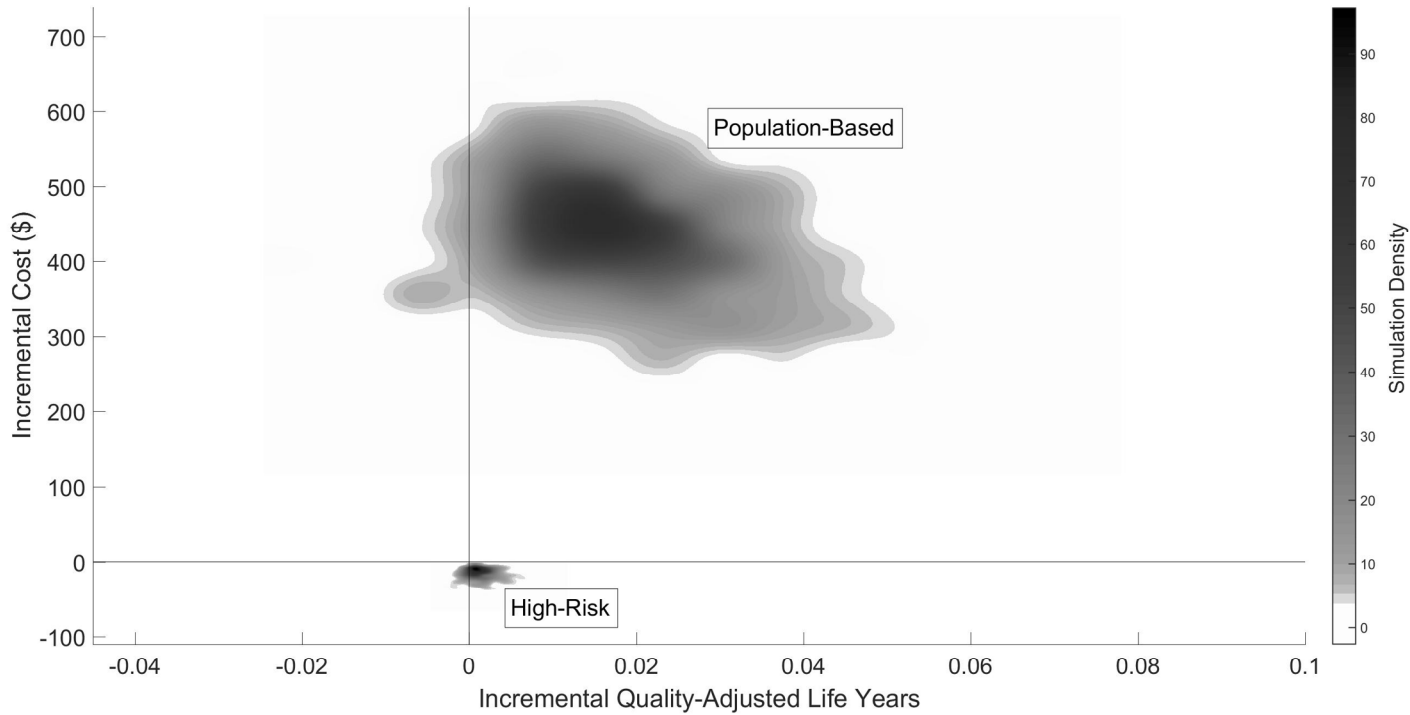

**Figure 2.** Cost-effectiveness plane of 1,000 Markov simulations in both a high-risk approach and population-based approach assuming a DFU prevention effectiveness of 30%. The majority of simulations conclude that screening by TM results in a gain of QALYs, while only the high-risk screening strategy results in cost savings to the health care system.

1  
2  
3  
4  
5  
6  
7  
8  
9  
10  
11  
12  
13  
14  
15  
16  
17  
18  
19  
20  
21  
22  
23  
24  
25  
26  
27  
28  
29  
30  
31  
32  
33  
34  
35  
36  
37  
38  
39  
40  
41  
42  
43  
44  
45  
46  
47  
48  
49  
50  
51  
52  
53  
54  
55  
56  
57  
58  
59  
60

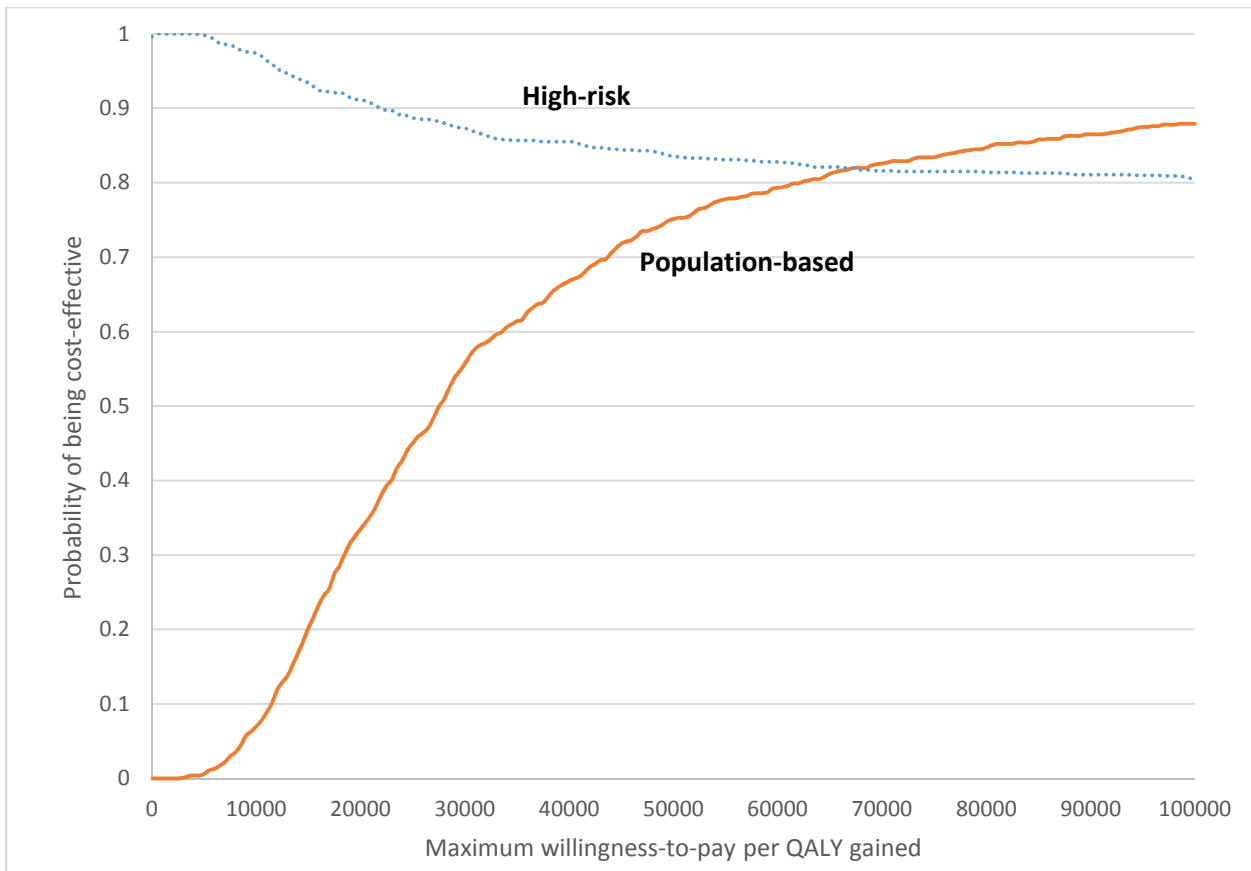

Figure 3: Cost-effectiveness acceptability curve, which summarizes the impact of uncertainty on the results, showing the proportion of simulations that resulted in an ICER less than a WTP threshold (x-axis) for the high-risk and population-based approaches at 30% effectiveness. These proportions can be interpreted as probability of cost-effectiveness, based on 1000 simulations.

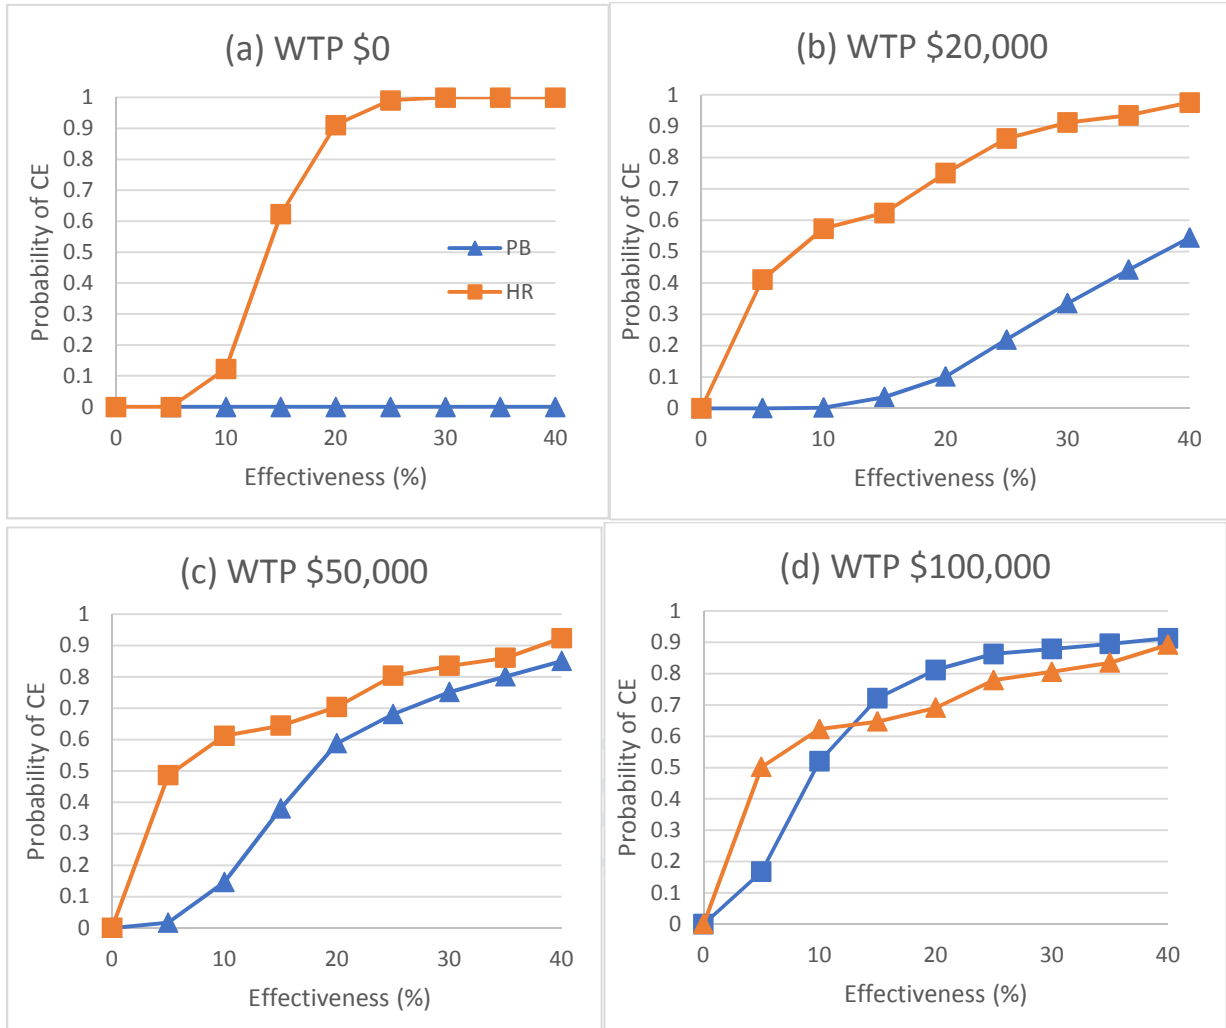

Figure 4. Varying the effectiveness of the TM intervention influences the probability of cost-effectiveness at given willingness-to-pay (WTP) thresholds. At a WTP of \$0 (A), \$20,000 (B), and \$50,000 (C), the high-risk approach has a higher probability of cost-effectiveness. At a WTP of \$100,000 (D) and effectiveness above 15%, the population-based approach had a higher probability of cost-effectiveness than the high-risk approach.

## Supplementary Information

### Methods

#### ***Model validation***

The following validation techniques are based on ISPOR-SMDM recommended practices for model transparency and validation(1). As the prevention of DFUs is not well studied in literature(2), it is important to note that this model serves as a framework for future research in this area.

#### ***Face validity***

Multiple steps were taken to ensure face validity. The problem formulation process determined a focus on a Canadian context, identified a population with diabetes who are low to high risk of DFUs, defined a TM intervention that aims to prevent DFUs, and selected a time horizon that reflects the natural history of DFUs.

The model structure was constructed and rigorously adjusted by experts in modelling (WI) and diabetic foot care (KC) to emulate recommended practices in DFU prevention according to the International Working Group for the Diabetic Foot. Since the modelling of DFU prevention is in its early stages in literature, data applicable to this model was limited. With this in mind, the data sources consulted for the construction of the model were verified for appropriate study design and applicability of results. Decisions were made to include certain DFU states and to exclude others, such as not distinguishing between minor and major amputations. Also, the complexity of DFU progression was not modelled, due lack of applicable data for this progression and that representing it as a number of discrete states is clinically impractical.

#### ***Verification***

To ensure the correct mathematical equations were used in the model, a structured walk-through of the code was conducted by CB to WI. To ensure that the model performed according to its specification, extreme-value analysis was conducted by predicting the behaviour of the model when a certain parameter is adjusted.

#### ***Cross Validity***

Since no other studies have explored the cost-effectiveness of TM, we identified other studies with models that evaluate the cost-effectiveness of DFU prevention.

The first study identified was by Tennvall and Apelqvist, 2001 where a cost-utility analysis was conducted to evaluate the prevention of DFUs and amputations(3). The prevention strategy defined was patient education, foot care, and footwear. It was found that DFU and amputation incidence needs to be reduced by 25% to be cost-effective, which was identified as ICER < €100,000/QALY. This is similar to the results our model produced as there is an increase in cost per QALY gained. However model structures are different. For example, the model did not include the stratification of risk groups, but instead the model was simulated individually for each group at risk for DFUs. Also, the healing rates of DFUs were assumed to be same, regardless of which risk group the DFU originated from. This assumption can influence the

1  
2  
3 results, as DFUs with and without peripheral arterial disease can heal at different rates(4).  
4 Similarly, Ortegon et al., 2004 also varied the effectiveness (between 10%-90%) of the  
5 interventions to identify thresholds of cost-effectiveness (5). Also, the model included states for  
6 risk groups before DFU development. However, the cohort was assumed to be all in the lowest  
7 risk group and transitioned into the others over time, which is not representative of a diabetic  
8 population. Similar to Tennvall and Apelqvist 2001, this model also assumed DFUs healed at the  
9 same rates regardless of risk group. As expected, the outcomes (ICERs) between this model and  
10 ours were different. However, both models showed that, depending on prevention  
11 effectiveness, there is an increase in cost per QALY gained. Lastly, Barshes et al. 2017,  
12 estimated cost-savings in diabetic foot ulcer prevention efforts(6). Specifically, this study  
13 explored the effects of improved prevention (primary) and treatment (secondary) by varying its  
14 effectiveness. A major distinction is that this model identifies annual prevention cost thresholds  
15 for cost-savings, rather than the traditional ICER. This makes it's difficult to compare outcomes  
16 of the models. In addition, the model did not include a cost for stratifying a person into a risk  
17 group, which can significantly change the results presented. However, similar methodologies  
18 were used in both models, such as varying effectiveness thresholds and incorporating the  
19 stratification of the cohort into risk groups in order to determine appropriate screening  
20 strategies. Also, this model used a one-month cycle length, which may not reflect how DFUs  
21 progress in current available research, as follow-up visits are 1 year on average.  
22  
23  
24  
25  
26  
27  
28

### 29 **Definitions of study parameters**

#### 30 *Pre-DFU*

31 The risk groups defined in this paper were based on the guidelines from *Best Practice*  
32 *Recommendations for the Prevention and Management of Diabetic Foot Ulcers* published by  
33 Wounds Canada (See Table 1). These recommendations were used to define 3 risk groups for  
34 our model: low risk, moderate risk, and high risk (recurrent DFU). The high-risk group assumed  
35 that recurrent DFUs either recurred at the same spot as the prior DFU, or in a new spot, as  
36 many studies do not distinguish between the types. The transition probability into the  
37 moderate risk group was derived from the estimate of 1/3 people with diabetes having  
38 peripheral artery disease (PAD) by the American Diabetes Association and Barshes et al. 2013.  
39 The mortality rate for the moderate risk group was based on a study by Mueller et al. 2014 that  
40 reported mortality rates in patients with diabetes and PAD. The mortality rate for the low risk  
41 group was based on Statistics Canada 2008 data on the number of deaths per 100,000  
42 population with diabetes. Amputation rates prior to DFU formation was based on a study that  
43 observed lower limb amputation rates among diabetes patients without foot ulcer in Medicare  
44 and private insurance (12).  
45  
46  
47  
48

#### 49 *DFU*

50 The transition probability from a low risk group to a moderate risk group was obtained from a  
51 previous cost-effectiveness study by Ortegon et al. 2004 (5). The transition probabilities for the  
52 development of low-risk and moderate-risk DFUs were derived from Lavery et al. 2008, where  
53 the incidence of DFUs were observed in people with diabetes stratified by risk factors with  
54 preference for conservative estimates (13). Amputation rates from low risk, moderate risk and  
55  
56  
57  
58  
59  
60

1  
2  
3 recurrent DFUs were compared between five studies to derive the probabilities used in this  
4 model (16-21) . Since little data exists on mortality rates for recurrent DFUs, and Orneholm et  
5 al. 2017 (17) reports a significantly lower mortality rate than rates reported for DFUs with PAD,  
6 it was assumed that the mortality rate is the same as having a moderate risk DFU.  
7

### 8 *Amputation*

9 The amputation state was assumed to include both major and minor amputations and does not  
10 distinguish the cost difference between the two. The effects of this is further explored in the  
11 sensitivity analysis. When in the amputated state, a person can transition into either the healed  
12 amputation state or death. Mortality rates are adjusted as time increases via Markov tunnel  
13 states. As time increases, mortality rates increase. This increase is derived from Kaplan Meier  
14 survival estimates in Aulivola et al. 2004 and Fortington et al. 2013 (20, 21) (Figure 2).  
15  
16

17  
18 Probability sensitivity analyses were achieved using Dirichlet and beta distributions for all state  
19 transition probabilities (22).  
20

### 21 **Cost and utilities values**

#### 22 *Measurement and Valuation of Outcomes*

23 Estimates of health utilities associated with each state was obtained from an extensive review  
24 of utility values in type 2 diabetes specific for economic modelling (23). This review did not  
25 include a utility value for healed DFUs, which was derived from Redekop, 2000 (24).  
26  
27

#### 28 *Resource Use and Costs*

29 The costs of treatment were based on annual estimates of hospital costs from the Canadian  
30 Institute for Health Information's Patient Cost Estimator (25). This report included the cost of  
31 Diabetes with Foot Ulcer, Amputation of Hand/Foot, Biopsy of Bone and Orthopedic Aftercare  
32 (SI Table 3). Hopkins et al. 2015 reported that the average number of admissions per prevalent  
33 case was 0.66, so this was used to adjust the cost proportion in the DFU state (26).  
34  
35

36  
37 The physician fees were based on the Schedule of Benefits: Physician Services under the Health  
38 Insurance Act (5) (SI Table 4). Validated by KC, billing codes descriptions used for DFUs are  
39 Wound and ulcer debridement and Wound and ulcer debridement extending into any of the  
40 following structures: tendon, ligament, bursa and/or bone. The average of these costs was used  
41 in this model. Physician fees for amputations are the average costs of Amputation-Bone Code-  
42 Musculoskeletal System for Metatarsal/phalanx disarticulation, Ray(single), Symes,  
43 Transmetatarsal/transtarsal, Terminal Symes, and the average costs of Biopsies for Need-  
44 Punch, Needle – under general anesthetic, Needle – open, and Joint – open. Physician fees for  
45 screening and prevention visits prior to a DFU (for both in-person and telemedicine) and follow-  
46 up visits with a healed DFU were based the average costs for Diabetic screening with a family  
47 physician, and endocrinologist visits. Table 3 lists all of the billing codes used to derive costs in  
48 the model.  
49  
50  
51

52  
53 The cost of a TM solution was derived from the operating costs of the Ontario Telemedicine  
54 Network (OTN) in a financial statement from 2016 (27). The services provided by the OTN  
55 leverages similar technology required for a hypothetical telemonitoring intervention for DFUs  
56  
57  
58  
59  
60

1  
2  
3 and was used as our baseline cost. The cost of the TM device was derived from Easterholdt et  
4 al. 2016 using www.xe.com, where a similar device was used to monitor DFUs (28). Since this  
5 cost is sourced from a different jurisdiction and represents a small portion of total costs,  
6 laborious cost conversion is irrelevant. The physician fees associated with the use of the device  
7 for screening was assumed to be the combined cost of telemedicine billing codes defined in the  
8 OHIP Billing Information for Telemedicine Services September 2011 and the cost of a regular in-  
9 person screening visit. This assumption was made as the type of interaction via the TM device is  
10 not defined within the Schedule of Benefits.  
11  
12  
13  
14  
15  
16  
17  
18  
19  
20  
21  
22  
23  
24  
25  
26  
27  
28  
29  
30  
31  
32  
33  
34  
35  
36  
37  
38  
39  
40  
41  
42  
43  
44  
45  
46  
47  
48  
49  
50  
51  
52  
53  
54  
55  
56  
57  
58  
59  
60

Confidential

1  
2  
3 **Tables and Figures**  
4

5  
6 **SI Table 1.** Risk groups for developing DFUs used in models based on International Working  
7 Group on the Diabetic Foot (IWGDF) guidelines reported by Wounds Canada.  
8

9  
10  
11  
12  
13  
14  
15  
16  
17  
18  
19  
20  
21  
22  
23  
24  
25  
26  
27  
28  
29  
30  
31  
32  
33  
34  
35  
36  
37  
38  
39  
40  
41  
42  
43  
44  
45  
46  
47  
48  
49  
50  
51  
52  
53  
54  
55  
56  
57  
58  
59  
60

| Clinical state in model | IWGDF(7) | Recommended Professional Follow-up(7) | Characteristics                                                             |
|-------------------------|----------|---------------------------------------|-----------------------------------------------------------------------------|
| Low Risk for DFU        | 0        | Every 12 months                       | No loss of protective sensation<br><br>No peripheral arterial disease (PAD) |
|                         | 1        | Every 4-6 months                      | No loss of protective sensation ± non-changing foot deformity               |
| Moderate Risk for DFU   | 2a&b     | Every 3 months                        | PAD and/or deformity ± loss of protective sensation                         |
| DFU Recurrence          | 3a&b     | Every 1-3 months                      | Presence of diabetes with previous history of ulceration/amputation         |
| Active DFU states       | Urgent   | Immediate referral                    | Open ulcer ± infections<br><br>Charcot foot                                 |



**SI Table 2.** All transition probability parameter estimates, and sources used in Markov Model for current screening efforts in Canada. All telemonitoring Markov Models used same parameter estimates, except DFU incidence rates. Specifically, the transition from a healed DFU state to a recurrent DFU state was decreased by 5%-40% (high-risk) and the transition from a low risk, moderate risk and healed DFU state to a DFU state was decreased by 5%-40% (population-based).

| <i>Transitions</i>             | <i>Value(Range)</i>     | <i>Source</i>             |                                                                           |
|--------------------------------|-------------------------|---------------------------|---------------------------------------------------------------------------|
| <b>Person with Diabetes</b>    | At low risk of DFU      | 66.83%                    |                                                                           |
|                                | At moderate risk of DFU | 33.0%                     | American Diabetes Association, 2014(8)                                    |
|                                | Amputation              | 0.01%                     | Rice et al., 2014(12)                                                     |
|                                | Death                   | 0.16%                     | Statistics Canada, 2014(11)                                               |
| <b>Amputation</b>              | Healed amputation       | See figure 2              |                                                                           |
|                                | Death                   | See figure 2              | Aulivola et al., 2004(20)                                                 |
| <b>At low risk of DFU</b>      | At low risk of DFU      | 99.46%                    |                                                                           |
|                                | Amputation              | 0.01% (0.00667 - 0.01334) | Rice et al., 2014(12)                                                     |
|                                | Develop low risk DFU    | 0.3% (0.18 - 0.41)        | Lavery et al., 2008(13)                                                   |
|                                | Death                   | 0.16%                     | Statistics Canada, 2014(11)                                               |
|                                | At moderate risk of DFU | 0.07%                     | Ortegon et al., 2004(5)                                                   |
| <b>Develop low risk DFU</b>    | Develop low risk DFU    | 52.45%                    |                                                                           |
|                                | Healed DFU              | 45.71%                    | Prompers et al., 2008(4)                                                  |
|                                | Amputation              | 0.67% (0.3 - 0.77)        | Lavery et al., 2008(13), Moulik et al., 2003(8), Prompers et al., 2008(4) |
|                                | Death                   | 1.17% (1.01 - 2.57)       | Prompers et al., 2008(4), Morbach et al., 2012(16)                        |
| <b>At moderate risk of DFU</b> | At moderate risk of DFU | 99.38%                    |                                                                           |

|                                  |                       |                       |                                                                                                     |
|----------------------------------|-----------------------|-----------------------|-----------------------------------------------------------------------------------------------------|
|                                  | Amputation            | 0.01%                 | Rice et al., 2014(12)                                                                               |
|                                  | Develop high risk DFU | 0.45% (0.27 - 1.31)   | Lavery et al., 2008(13)                                                                             |
|                                  | Death                 | 0.67%                 | Mueller et al., 2014(10)                                                                            |
| <b>Develop moderate risk DFU</b> | Develop high risk DFU | 61.68%                |                                                                                                     |
|                                  | Healed DFU            | 32.32%                | Prompers et al., 2008(4)                                                                            |
|                                  | Amputation            | 2.74% (0.063 - 8.54)  | Lavery et al., 2008(13), Morbach et al., 2012(16), Oyibo et al., 2001(15), Prompers et al., 2008(4) |
|                                  | Death                 | 3.26% (3.26 - 8.07)   | Prompers et al., 2008(4), Morbach et al., 2012(16)                                                  |
| <b>Healed DFU</b>                | Healed DFU            | 87.06%                |                                                                                                     |
|                                  | Develop recurrent DFU | 11.21% (7.17 - 15.66) | Armstrong et al., 2017(18), Dubsky et al., 2013(13)                                                 |
|                                  | Amputation            | 0.01%                 | Rice et al., 2014(12)                                                                               |
|                                  | Death                 | 1.01% (0.57 - 1.56)   | Orneholm et al., 2017(17)                                                                           |
| <b>Recurrent DFU</b>             | Recurrent DFU         | 81.78%                |                                                                                                     |
|                                  | Healed DFU            | 11.51%                | Orneholm et al., 2017(17)                                                                           |
|                                  | Amputation            | 3.45% (0.68 - 3.45)   | Lavery et al., 2008(5), Orneholm et al., 2017(17)                                                   |
|                                  | Death                 | 3.26%                 | Prompers et al., 2008(4), Morbach et al., 2012(9), Orneholm et al., 2017(17)                        |

**SI Table 3.** Canadian Institute for Health Information Patient Cost Estimator (25) data used for costing DFUs and amputations.

| Case Mix Group                         | Age Group               | Estimated Average Cost | Estimated Average Cost (all age groups) | Average Acute LOS days |
|----------------------------------------|-------------------------|------------------------|-----------------------------------------|------------------------|
| 402 Diabetes with Foot Ulcer           | 18-59 Years (Adult)     | \$ 9,984.36            | \$ 10,250.73                            | 7.8377483              |
|                                        | 60-79 Years (Adult)     | \$ 10,647.33           | \$ 10,250.73                            | 9.4900459              |
|                                        | 80+ Years (Adult)       | \$ 9,822.41            | \$ 10,250.73                            | 9.8122271              |
| 183 Amputation of Hand/Foot            | 18-59 Years (Adult)     | \$ 9,864.15            | \$ 10,071.53                            | 8.6962963              |
|                                        | 60-79 Years (Adult)     | \$ 10,153.88           | \$ 10,071.53                            | 9.4888889              |
|                                        | 80+ Years (Adult)       | \$ 10,138.53           | \$ 10,071.53                            | 12                     |
| 342 Biopsy/Invasive Inspection of Bone | 1-7 Years (Paediatric)  | \$ 5,406.19            | \$ 5,145.99                             | 5.0833333              |
|                                        | 8-17 Years (Paediatric) | \$ 4,069.78            | \$ 5,145.99                             | 1.8627451              |
|                                        | 18-59 Years (Adult)     | \$ 4,758.34            | \$ 5,145.99                             | 2.6986301              |
|                                        | 60-79 Years (Adult)     | \$ 5,387.70            | \$ 5,145.99                             | 3.6666667              |
|                                        | 80+ Years (Adult)       | \$ 9,163.79            | \$ 5,145.99                             | 12.434783              |

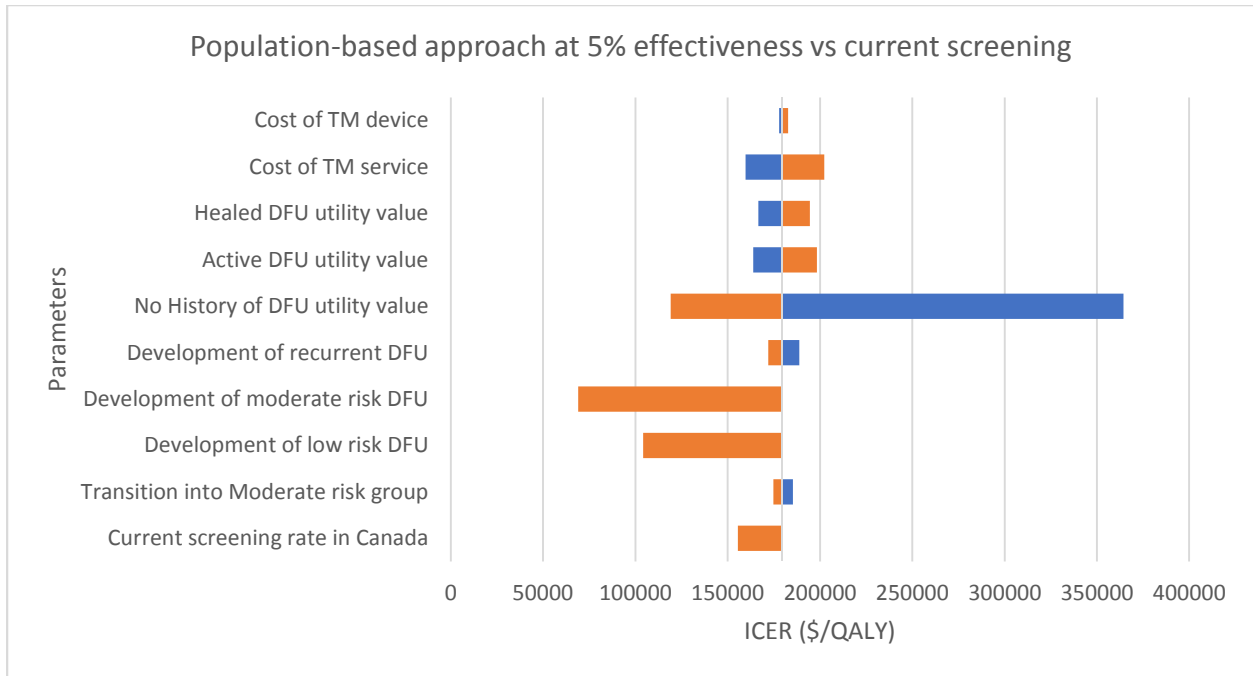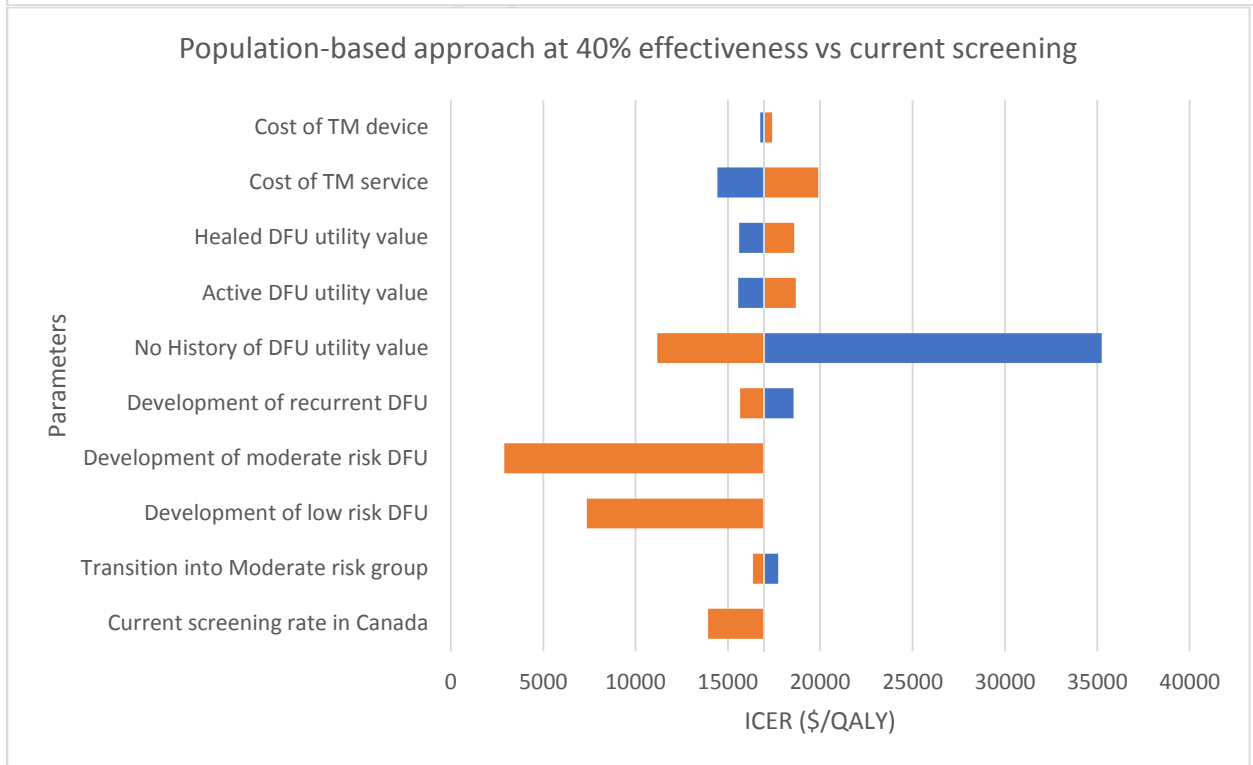

**SI Figure 1:** Population-based approach one-way sensitivity analyses. Analyses were run for effectiveness values ranging from 5% to 40% in increments of 5%, but since trends changed very little only the highest and lowest effectiveness values are shown.

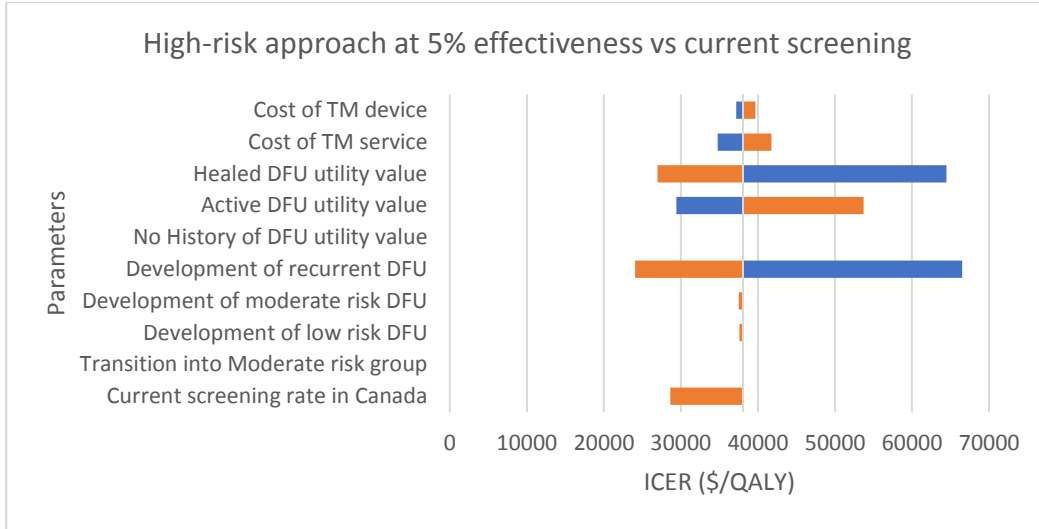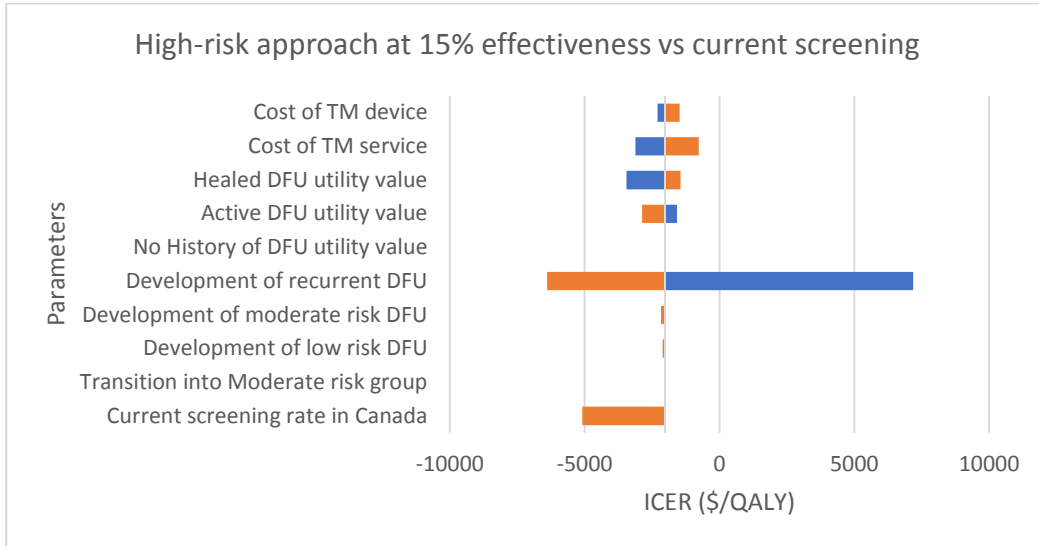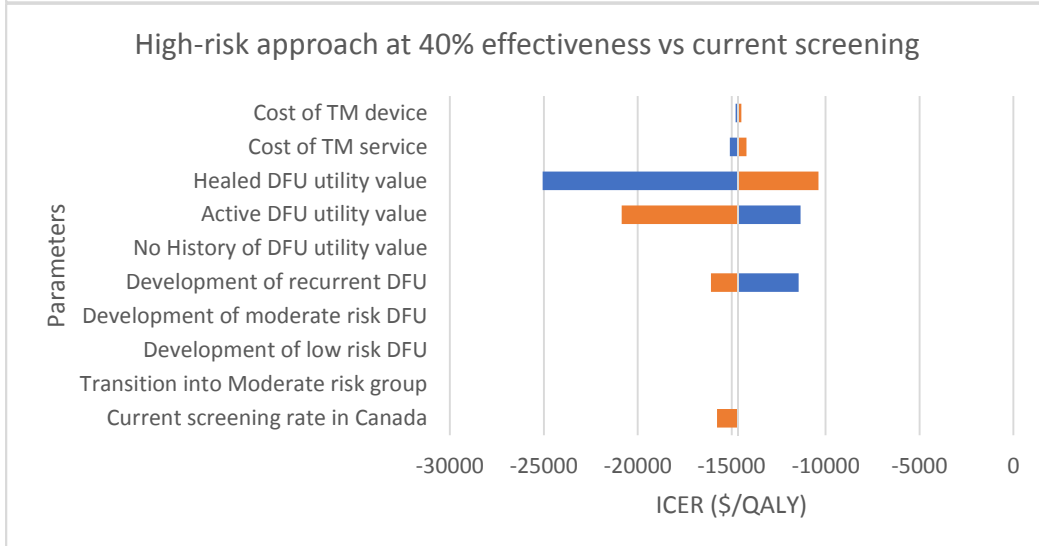

1  
2  
3 **SI Figure 2:** High-risk approach one-way sensitivity analyses. Analyses were run from 5% effectiveness to 40% effectiveness in increments of 5%. Trends changed more dramatically than  
4 the population-based analysis, and representative tornado diagrams are shown.  
5  
6  
7  
8  
9  
10  
11  
12  
13  
14  
15  
16  
17

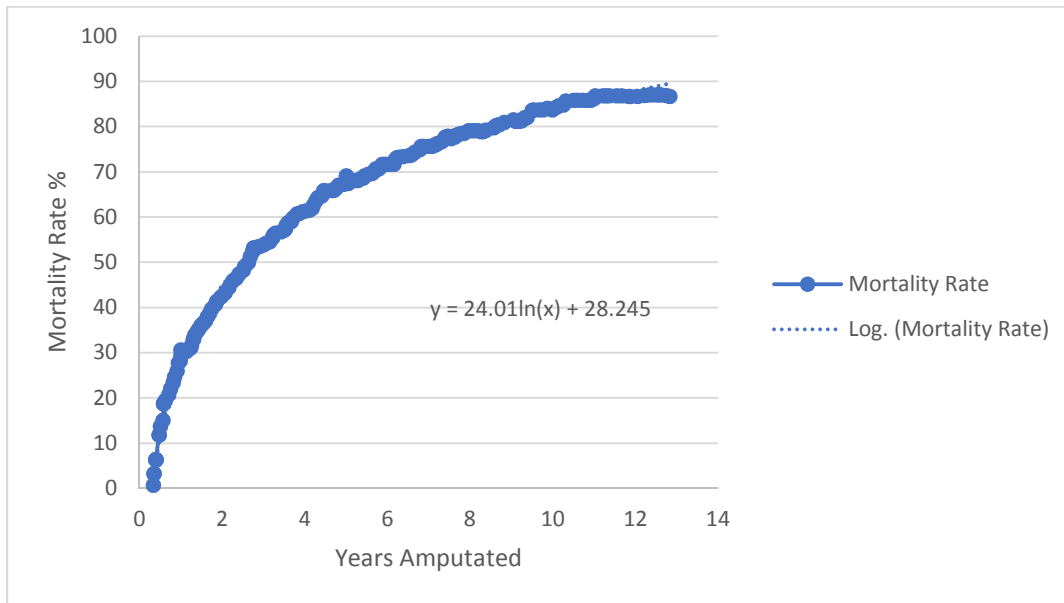

37  
38 **SI Figure 3:** Kaplan Meier curve derived from Aulivola et al. 2004 (20) and Fortington et al. 2013  
39 (21) mortality rates for diabetics with lower extremity amputations.  
40  
41  
42  
43  
44  
45  
46  
47  
48  
49  
50  
51  
52  
53  
54  
55  
56  
57  
58  
59  
60

## Supplementary Information References

1. Eddy DM, Hollingworth W, Caro JJ, Tsevat J, McDonald KM, Wong JB. Model Transparency and Validation: A Report of the ISPOR-SMDM Modeling Good Research Practices Task Force-7. *Value Health*. 2012 Sep;15(6):843–50.
2. Bus SA, van Netten JJ. A shift in priority in diabetic foot care and research: 75% of foot ulcers are preventable. *Diabetes Metab Res Rev*. 2016 Jan 1;32:195–200.
3. Tennvall GR, Apelqvist J. Prevention of diabetes-related foot ulcers and amputations: a cost-utility analysis based on Markov model simulations. *Diabetologia*. 2001;44(11):2077–2087.
4. Prompers L, Schaper N, Apelqvist J, Edmonds M, Jude E, Mauricio D, et al. Prediction of outcome in individuals with diabetic foot ulcers: focus on the differences between individuals with and without peripheral arterial disease. The EURODIALE Study. *Diabetologia*. 2008 May;51(5):747–55.
5. Ortegon MM, Redekop WK, Niessen LW. Cost-effectiveness of prevention and treatment of the diabetic foot. *Diabetes Care*. 2004;27(4):901–907.
6. Barshes NR, Saedi S, Wrobel J, Kougias P, Kundakcioglu OE, Armstrong DG. A model to estimate cost-savings in diabetic foot ulcer prevention efforts. *J Diabetes Complications*. 2017 Apr;31(4):700–7.
7. Botros M, Kuhnke JL, Embil J, Goettl K, Morin C, Parsons L, et al. Prevention and Management of diabetic foot [Internet]. *Wounds Canada*; 2017 [cited 2017 May 15]. Available from: <https://www.woundscanada.ca/docman/public/health-care-professional/bpr-workshop/560-bpr-prevention-and-management-of-diabetic-foot-ulcers/file>
8. American Diabetes Association. Peripheral Arterial Disease (PAD) [Internet]. American Diabetes Association. 2014 [cited 2017 Jul 6]. Available from: <http://www.diabetes.org/living-with-diabetes/complications/heart-disease/peripheral-arterial-disease.html>
9. Barshes NR, Sigireddi M, Wrobel JS, Mahankali A, Robbins JM, Kougias P, et al. The system of care for the diabetic foot: objectives, outcomes, and opportunities. *Diabet Foot Ankle*. 2013 Jan;4(1):21847.
10. Mueller T, Hinterreiter F, Luft C, Poelz W, Haltmayer M, Dieplinger B. Mortality rates and mortality predictors in patients with symptomatic peripheral artery disease stratified according to age and diabetes. *J Vasc Surg*. 2014 May;59(5):1291–9.
11. Statistics Canada. Rate per 100,000 population for diabetes mellitus as underlying and contributing cause, by sex, age group, neighbourhood income quintile and province/territory, Canada, 2004 to 2008 [Internet]. Ottawa; 2014 Mar [cited 2017 Aug 8].

(Statistics Canada Catalogue no. 82-003-X). Available from:  
<http://www.statcan.gc.ca/pub/82-003-x/2014003/article/11909/tbl/tbl1-eng.htm>

12. Rice JB, Desai U, Cummings AKG, Birnbaum HG, Skornicki M, Parsons NB. Burden of diabetic foot ulcers for medicare and private insurers. *Diabetes Care*. 2014;37(3):651–658.
13. Lavery LA, Peters EJ, Williams JR, Murdoch DP, Hudson A, Lavery DC. Reevaluating the way we classify the diabetic foot. *Diabetes Care*. 2008;31(1):154–156.
14. Moulik PK, Mtonga R, Gill GV. Amputation and Mortality in New-Onset Diabetic Foot Ulcers Stratified by Etiology. *Diabetes Care*. 2003 Feb 1;26(2):491–4.
15. Oyibo SO, Jude EB, Tarawneh I, Nguyen HC, Armstrong DG, Harkless LB, et al. The effects of ulcer size and site, patient's age, sex and type and duration of diabetes on the outcome of diabetic foot ulcers. *Diabet Med*. 2001;18(2):133–138.
16. Morbach S, Furchert H, Gröblichhoff U, Hoffmeier H, Kersten K, Klauke G-T, et al. Long-Term Prognosis of Diabetic Foot Patients and Their Limbs. *Diabetes Care*. 2012 Oct 1;35(10):2021–7.
17. Örneholm H, Apelqvist J, Larsson J, Eneroth M. Recurrent and other new foot ulcers after healed plantar forefoot diabetic ulcer. *Wound Repair Regen Off Publ Wound Heal Soc Eur Tissue Repair Soc*. 2017 Apr 1;
18. Armstrong DG, Boulton AJM, Bus SA. Diabetic Foot Ulcers and Their Recurrence. *N Engl J Med*. 2017 Jun 15;376(24):2367–75.
19. Dubský M, Jirkovská A, Bem R, Fejfarová V, Skibová J, Schaper NC, et al. Risk factors for recurrence of diabetic foot ulcers: prospective follow-up analysis in the Eurodiale subgroup. *Int Wound J*. 2013 Oct;10(5):555–61.
20. Aulivola B, Hile CN, Hamdan AD, Sheahan MG, Veraldi JR, Skillman JJ, et al. Major Lower Extremity Amputation: Outcome of a Modern Series. *Arch Surg*. 2004 Apr 1;139(4):395–9.
21. Fortington LV, Geertzen JHB, van Netten JJ, Postema K, Rommers GM, Dijkstra PU. Short and Long Term Mortality Rates after a Lower Limb Amputation. *Eur J Vasc Endovasc Surg*. 2013 Jul;46(1):124–31.
22. Briggs A, Claxton K, Sculpher M. *Decision Modelling for Health Economic Evaluation*. Oxford; 2006. 237 p.
23. Beudet A, Clegg J, Thuresson P-O, Lloyd A, McEwan P. Review of Utility Values for Economic Modeling in Type 2 Diabetes. *Value Health*. 2014 Jun;17(4):462–70.



- 1
  - 2
  - 3
  - 4
  - 5
  - 6
  - 7
  - 8
  - 9
  - 10
  - 11
  - 12
  - 13
  - 14
  - 15
  - 16
  - 17
  - 18
  - 19
  - 20
  - 21
  - 22
  - 23
  - 24
  - 25
  - 26
  - 27
  - 28
  - 29
  - 30
  - 31
  - 32
  - 33
  - 34
  - 35
  - 36
  - 37
  - 38
  - 39
  - 40
  - 41
  - 42
  - 43
  - 44
  - 45
  - 46
  - 47
  - 48
  - 49
  - 50
  - 51
  - 52
  - 53
  - 54
  - 55
  - 56
  - 57
  - 58
  - 59
  - 60
24. Redekop WK, Stolk E, Kok E, Lovas K, Kalo Z, Busschbach J. Diabetic foot ulcers and amputations: estimates of health utility for use in cost-effectiveness analyses of new treatments. *Diabetes Metab.* 2004;30(6):549–56.
25. Canadian Institute for Health Information. Patient Cost Estimator - Methodological Notes and Glossary. Ottawa, ON; 2016.
26. Hopkins RB, Burke N, Harlock J, Jegathisawaran J, Goeree R. Economic burden of illness associated with diabetic foot ulcers in Canada. *BMC Health Serv Res.* 2015 Dec;15(1):13.
27. Ministry of Health and Long Term Care. Schedule of Benefits: Physician Services Under the Health Insurance Act [Internet]. [cited 2017 Jun 14]. Available from: [http://www.health.gov.on.ca/en/pro/programs/ohip/sob/physserv/sob\\_master20151221.pdf](http://www.health.gov.on.ca/en/pro/programs/ohip/sob/physserv/sob_master20151221.pdf)
28. Ernst & Young. Financial statements - Ontario Telemedicine Network [Internet]. Ernst & Young; 2016. Available from: <https://otn.ca/wp-content/uploads/2016/10/otn-audited-financial-statements-2015-2016.pdf>
29. FASTERHOLDT I, GERSTRØM M, RASMUSSEN BSB, YDERSTRÆDE KB, KIDHOLM K, PEDERSEN KM. Cost-effectiveness of telemonitoring of diabetic foot ulcer patients. *Health Informatics J.* 2016 Sep 16;1460458216663026.
30. Canadian Institute for Health Information. Patient Cost Estimator - Methodological Notes and Glossary. Ottawa, ON; 2016.
